# Supplementary material
Source: PubMed Central journal article supplement (PMC7903232)
Supplement: advancesADV2020003442C-suppl2.pdf [file advancesADV2020003442C-suppl2.pdf]

# Supplement 2: Panelists Disclosure of Interests Forms

Pablo Alonso

Cihan Ay

Marc Carrier

Marcello DiNisio

Lisa Hicks

Alok Khorana

Andrew Leavitt

Agnes Lee

Gary Lyman

Fergus Macbeth

Rebecca Morgan

Simon Noble

Holger Schünemann

David Stenejhem

Elizabeth Sexton

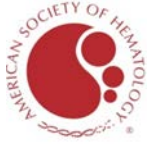

# ASH Guideline Panel Declarations of Interest Form

## Part A. Material Interests in Companies

### Equity

1. Do you currently or in the past 24 months have you had equity in any for-profit company that develops, produces, markets, or distributes drugs, devices, services, or therapies used to diagnose, treat, monitor, manage, or alleviate health conditions? Equity includes stock, stock options, and other ownership interests but excludes diversified mutual fund shares.

No

Yes, as described below:

Add rows as needed for each equity interest.

| <i>Company</i> | <i>Description</i> | <i>Date Divested</i> | <i>For ASH Internal Use</i> |
|----------------|--------------------|----------------------|-----------------------------|
|                |                    |                      |                             |
|                |                    |                      |                             |
|                |                    |                      |                             |
|                |                    |                      |                             |

### Patents and Royalties

2. Do you currently or in the past 24 months have you owned patents for or received royalties from any intellectual property or product used to diagnose, treat, monitor, manage, or alleviate health conditions?

No

Yes, as described below:

Add rows as needed for each patent or royalty interest.

| <i>Company</i> | <i>Description</i> | <i>Date Divested</i> | <i>For ASH Internal Use</i> |
|----------------|--------------------|----------------------|-----------------------------|
|                |                    |                      |                             |
|                |                    |                      |                             |
|                |                    |                      |                             |
|                |                    |                      |                             |

### Personal Income or Other Remuneration

3. Do you currently or in the past 24 months have you received personal income or other remuneration (e.g., reimbursement or financial support for the costs of travel) from any for-profit company that develops, produces, markets, or distributes drugs, devices, services, or therapies used to diagnose, treat, monitor, manage, or alleviate health conditions?

No

Yes, as described below:

Column 1 Name the company.

Column 2 Describe the activity for which you received income or other remuneration, e.g., employment, consultancy, speakers bureau involvement, service on an advisory committee or board, expert testimony.

Column 3 Indicate when the activity ended, if applicable. (If the activity has not yet ended, indicate “current” or “ongoing.”)

Add rows as needed for each activity.

To report activities that generate revenues for your institution, see Part B, Question 4.

| <i>Company</i> | <i>Description</i> | <i>End Date</i> | <i>For ASH Internal Use</i> |
|----------------|--------------------|-----------------|-----------------------------|
|                |                    |                 |                             |
|                |                    |                 |                             |
|                |                    |                 |                             |
|                |                    |                 |                             |
|                |                    |                 |                             |
|                |                    |                 |                             |
|                |                    |                 |                             |
|                |                    |                 |                             |

## Industry-Funded Research

4. Do you currently or in the past 24 months have you been involved in research funded or supported (e.g., in kind support) by any for-profit company that develops, produces, markets, or distributes drugs, devices, services, or therapies used to diagnose, treat, monitor, manage, or alleviate health conditions?

No

Yes, as described below:

Column 1 Name the company funding or supporting the research.

Column 2 Briefly describe the research project. Indicate if funding or support goes to you directly or to your institution.

Column 3 Describe your role: (a) national or overall principal investigator, (b) member of a steering committee of a study that does not have a principal investigator, (c) site or local investigator. If other than these options, please describe.

Column 4 Indicate when your involvement ended, if applicable. (If your involvement has not yet ended, indicate “current” or “ongoing.”)

Add rows as needed for each research project.

| <i>Company</i>       | <i>Description of Research</i>                                                                                                                                                                                             | <i>My Role</i>                                                           | <i>End Date</i> | <i>For ASH Internal Use</i>                                                                                                                                                                               |
|----------------------|----------------------------------------------------------------------------------------------------------------------------------------------------------------------------------------------------------------------------|--------------------------------------------------------------------------|-----------------|-----------------------------------------------------------------------------------------------------------------------------------------------------------------------------------------------------------|
| Boehringer Ingelheim | Investigator initiated Dabigatran trial in non-cardiac surgical patients with perioperative myocardial infarction.                                                                                                         | Site principal investigator or                                           | December 2017   | 4/20/2015: Dr. Alonso confirmed by email that funding goes to his institution and that he is the site PI (he reports to a PI located in Canada). By our guidelines, this interest is therefore not a COI. |
| Roche                | I have coauthored an economic analysis about the use of self-monitoring of anticoagulation or dabigatran in patients with atrial fibrillation. Funding goes to my institution. Roche manufactures self-monitoring devices. | Co-investigator. The actual work was mostly done by two health economist |                 | Not a COI because all funding went to his institution, he did not have a leadership role, and the subject of the analysis is not directly related to VTE in patients with cancer.                         |

| <i>Company</i> | <i>Description of Research</i>         | <i>My Role</i> | <i>End Date</i> | <i>For ASH Internal Use</i> |
|----------------|----------------------------------------|----------------|-----------------|-----------------------------|
|                | No idea what drugs Roche manufactures. |                |                 |                             |
|                |                                        |                |                 |                             |
|                |                                        |                |                 |                             |
|                |                                        |                |                 |                             |
|                |                                        |                |                 |                             |

### My Partner's or Spouse's Interests

5. Currently or in the past 24 months has *your partner or spouse* had any of the interests described in questions 1-4?

No

Yes, as described below:

Add rows as needed for each interest.

| <i>Company</i> | <i>Description</i> | <i>End Date</i> | <i>For ASH Internal Use</i> |
|----------------|--------------------|-----------------|-----------------------------|
|                |                    |                 |                             |
|                |                    |                 |                             |
|                |                    |                 |                             |

## Part B. Interests That Are Not Mainly Financial

You have been invited by ASH to participate in the development of clinical practice guidelines on the following topic(s):

Prevention and Treatment of VTE in Patients with Cancer

The questions that follow are designed to elicit information about personal beliefs, intellectual positions or opinions, institutional relationships, and other interests that are not mainly financial and that may be relevant to guidelines on the above topic(s).

### Personal Beliefs

1. Do you have strongly held beliefs related to the topic of these guidelines?

No

Yes

If yes, please explain:

### Previously Published Opinions

2. Have you ever authored, coauthored, or publicly provided an opinion related to the topic of these guidelines, e.g., a clinical practice guideline, textbook, review article, meeting poster or presentation, grand rounds talk, letter to the editor?

No

Yes

If yes, what were those views and where were they made?

### Research

3. Currently or in the past 24 months, have you been involved in a leadership role in any research project not already reported under Part A, Question 4, relevant to the topic of these guidelines, e.g., a research project funded by a nonprofit or governmental organization?

- No
- Yes, as described below:

Column 1 Name the entity funding the research.

Column 2 Describe the research project.

Column 3 Describe your role: (a) national or overall principal investigator, (b) member of a steering committee of a study that does not have a principal investigator, (c) site or local investigator. If other than these options, please describe.

Column 4 Indicate when your involvement ended, if applicable. (If your involvement has not yet ended, indicate "current" or "ongoing.")

Add rows as needed for each research project.

| <i>Funder</i> | <i>Description of Research</i> | <i>My Role</i> | <i>End Date</i> |
|---------------|--------------------------------|----------------|-----------------|
|               |                                |                |                 |
|               |                                |                |                 |
|               |                                |                |                 |
|               |                                |                |                 |

### Institutional Relationships

4. Do you generate revenues or nonfinancial benefits for your institution by teaching, speaking, consulting, testifying, writing, or otherwise sharing your knowledge or opinions about this guideline topic?

- Don't know
- No
- Yes

If yes, please explain:

5. Could your institution benefit or be harmed by recommendations of guidelines on this topic?

- Don't know
- No
- Yes

If yes, please explain:

## Career Advancement

6. How would you characterize the support you would receive from your primary mentor, institution, or other entities if your work on this panel or authorship of these guidelines generated a strong reaction from peers outside your institution?

Controversy is not a problem if the work is rigorous (which it will)

## Advocacy and Policy Positions

7. Do you work for or are you a member of an organization with a stated position related to the topic of these guidelines, e.g., position statement, editorial, blog, amicus brief, or legislature or legal testimony?

No

Yes

If yes, are you involved in formulating or voting for positions?

No

Yes

If yes, could recommendations of these guidelines conflict with policies you have promoted or are obligated to follow?

Don't know or not applicable

No

Yes

If yes, please explain:

## Professional Specialty

8. What is your primary clinical specialty or subspecialty?

Primary care

9. Do you prescribe or otherwise recommend diagnostic tests or treatments that may be addressed by these guidelines?

No



Yes

If yes, please explain:

## Expected Interests

10. Do you expect new financial or nonfinancial interests relevant to the topic of these guidelines not already declared in Part A or Part B of this form?

No

Yes

If yes, please describe:

## Part C. Summary (ASH Internal Use)

ASH will review your disclosures and summarize here interests that are judged to be current, material, and with an affected company. You will then be invited to review our determinations and to agree to make all parts of this form (A, B and C) publically available.

|                            |                                                                            |
|----------------------------|----------------------------------------------------------------------------|
| Name of guideline panel(s) | Guideline Panel on Prevention and Treatment of VTE in Patients With Cancer |
|----------------------------|----------------------------------------------------------------------------|

| <i>Approved to participate?</i> | <i>Status</i>         | <i>Recusal may be required?</i> | <i>Reviewer Name and Date</i> | <i>Notes</i>                                                     |
|---------------------------------|-----------------------|---------------------------------|-------------------------------|------------------------------------------------------------------|
| Yes                             | Unconflicted majority | No                              | 04/20/2015;<br>4/26/2015      |                                                                  |
| Yes                             | Unconflicted majority |                                 | 6/12/2020<br>Alexander        | On 6/12/2020, Dr. Alonso confirmed all information in this form. |
|                                 |                       |                                 |                               |                                                                  |
|                                 |                       |                                 |                               |                                                                  |

If status is conflicted minority, summarize all current material interests in affected companies:

| <i>Company</i> | <i>Description</i> | <i>Disclosure Date</i> | <i>ASH Notes</i> |
|----------------|--------------------|------------------------|------------------|
|                |                    |                        |                  |
|                |                    |                        |                  |
|                |                    |                        |                  |
|                |                    |                        |                  |

Notes:

|  |
|--|
|  |
|--|

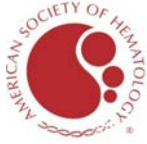

# ASH Guideline Panel Declarations of Interest Form

## Part A. Material Interests in Companies

### Equity

1. Do you currently or in the past 24 months have you had equity in any for-profit company that develops, produces, markets, or distributes drugs, devices, services, or therapies used to diagnose, treat, monitor, manage, or alleviate health conditions? Equity includes stock, stock options, and other ownership interests but excludes diversified mutual fund shares.

No

Yes, as described below:

Add rows as needed for each equity interest.

| <i>Company</i> | <i>Description</i> | <i>Date Divested</i> | <i>For ASH Internal Use</i> |
|----------------|--------------------|----------------------|-----------------------------|
|                |                    |                      |                             |
|                |                    |                      |                             |

### Patents and Royalties

2. Do you currently or in the past 24 months have you owned patents for or received royalties from any intellectual property or product used to diagnose, treat, monitor, manage, or alleviate health conditions?

No

Yes, as described below:

Add rows as needed for each patent or royalty interest.

| <i>Company</i> | <i>Description</i> | <i>Date Divested</i> | <i>For ASH Internal Use</i> |
|----------------|--------------------|----------------------|-----------------------------|
|                |                    |                      |                             |
|                |                    |                      |                             |

### Personal Income or Other Remuneration

3. Do you currently or in the past 24 months have you received personal income or other remuneration (e.g., reimbursement or financial support for the costs of travel) from any for-profit company that develops, produces, markets, or distributes drugs, devices, services, or therapies used to diagnose, treat, monitor, manage, or alleviate health conditions?

No

Yes, as described below:

Column 1 Name the company.

Column 2 Describe the activity for which you received income or other remuneration, e.g., employment, consultancy, speakers bureau involvement, service on an advisory committee or board, expert testimony.

Column 3 Indicate when the activity ended, if applicable. (If the activity has not yet ended, indicate “current” or “ongoing.”)

Add rows as needed for each activity.

To report activities that generate revenues for your institution, see Part B, Question 4.

| <i>Company</i> | <i>Description</i>           | <i>End Date</i> | <i>For ASH Internal Use</i>         |
|----------------|------------------------------|-----------------|-------------------------------------|
| Daiichi Sankyo | Service on an advisory board | February 2015   | Ended before appointment            |
| Bayer Austria  | Speaker bureau involvement   | current         | COI: Bayer markets rivaroxaban      |
| Pfizer and BMS | Speaker bureau involvement   | current         | COI: Pfizer and BMS market apixaban |
| Sanofi         | Speaker bureau involvement   | November 2013   | Ended before appointment            |
|                |                              |                 |                                     |

### Industry-Funded Research

4. Do you currently or in the past 24 months have you been involved in research funded or supported (e.g., in kind support) by any for-profit company that develops, produces, markets, or distributes drugs, devices, services, or therapies used to diagnose, treat, monitor, manage, or alleviate health conditions?

No

Yes, as described below:

- Column 1 Name the company funding or supporting the research.
- Column 2 Briefly describe the research project. Indicate if funding or support goes to you directly or to your institution.
- Column 3 Describe your role: (a) national or overall principal investigator, (b) member of a steering committee of a study that does not have a principal investigator, (c) site or local investigator. If other than these options, please describe.
- Column 4 Indicate when your involvement ended, if applicable. (If your involvement has not yet ended, indicate “current” or “ongoing.”)

Add rows as needed for each research project.

| <i>Company</i> | <i>Description of Research</i> | <i>My Role</i> | <i>End Date</i> | <i>For ASH Internal Use</i> |
|----------------|--------------------------------|----------------|-----------------|-----------------------------|
|                |                                |                |                 |                             |
|                |                                |                |                 |                             |

### My Partner’s or Spouse’s Interests

5. Currently or in the past 24 months has *your partner or spouse* had any of the interests described in questions 1-4?

No

Yes, as described below:

Add rows as needed for each interest.

| <i>Company</i> | <i>Description</i> | <i>End Date</i> | <i>For ASH Internal Use</i> |
|----------------|--------------------|-----------------|-----------------------------|
|                |                    |                 |                             |
|                |                    |                 |                             |

## Part B. Interests That Are Not Mainly Financial

You have been invited by ASH to participate in the development of clinical practice guidelines on the following topic(s):

Prevention and Treatment of VTE in Patients with Cancer

The questions that follow are designed to elicit information about personal beliefs, intellectual positions or opinions, institutional relationships, and other interests that are not mainly financial and that may be relevant to guidelines on the above topic(s).

### Personal Beliefs

1. Do you have strongly held beliefs related to the topic of these guidelines?

No

Yes

If yes, please explain:

### Previously Published Opinions

2. Have you ever authored, coauthored, or publicly provided an opinion related to the topic of these guidelines, e.g., a clinical practice guideline, textbook, review article, meeting poster or presentation, grand rounds talk, letter to the editor?

No

Yes

If yes, what were those views and where were they made?

I have (co)authored review articles related to the topic of these guidelines:

**Ay C, Pabinger I.** [VTE risk assessment in cancer. Who needs prophylaxis and who does not?](#) *Hamostaseologie*. 2015 Mar 5; 35(2).

**Pabinger I, Ay C.** [Risk of venous thromboembolism and primary prophylaxis in cancer. Should all patients receive thromboprophylaxis?](#) *Hamostaseologie*. 2012; 32(2):132-7. doi: 10.5482/ha-1173.

**Ay C, Pabinger I.** [Treatment and secondary prevention of venous thromboembolism in cancer patients. Current strategies and new therapeutic options.](#) *Hamostaseologie*. 2012;32(2):139-44. doi: 10.5482/ha-1168.

## Research

3. Currently or in the past 24 months, have you been involved in a leadership role in any research project not already reported under Part A, Question 4, relevant to the topic of these guidelines, e.g., a research project funded by a nonprofit or governmental organization?

No

Yes, as described below:

Column 1 Name the entity funding the research.

Column 2 Describe the research project.

Column 3 Describe your role: (a) national or overall principal investigator, (b) member of a steering committee of a study that does not have a principal investigator, (c) site or local investigator. If other than these options, please describe.

Column 4 Indicate when your involvement ended, if applicable. (If your involvement has not yet ended, indicate “current” or “ongoing.”)

Add rows as needed for each research project.

| <i>Funder</i> | <i>Description of Research</i> | <i>My Role</i> | <i>End Date</i> |
|---------------|--------------------------------|----------------|-----------------|
|               |                                |                |                 |
|               |                                |                |                 |
|               |                                |                |                 |
|               |                                |                |                 |

## Institutional Relationships

4. Do you generate revenues or nonfinancial benefits for your institution by teaching, speaking, consulting, testifying, writing, or otherwise sharing your knowledge or opinions about this guideline topic?

Don't know

No

Yes

If yes, please explain:

5. Could your institution benefit or be harmed by recommendations of guidelines on this topic?

Don't know

No

Yes

If yes, please explain:

## Career Advancement

6. How would you characterize the support you would receive from your primary mentor, institution, or other entities if your work on this panel or authorship of these guidelines generated a strong reaction from peers outside your institution?

I am a young early career academic researcher and would hope that my work on this panel would help me to further develop my career in academia (at my institution)

## Advocacy and Policy Positions

7. Do you work for or are you a member of an organization with a stated position related to the topic of these guidelines, e.g., position statement, editorial, blog, amicus brief, or legislature or legal testimony?

No

Yes

If yes, are you involved in formulating or voting for positions?

No

Yes

If yes, could recommendations of these guidelines conflict with policies you have promoted or are obligated to follow?

Don't know or not applicable

No

Yes

If yes, please explain:



## Professional Specialty

8. What is your primary clinical specialty or subspecialty?

Internal Medicine, Haematology

9. Do you prescribe or otherwise recommend diagnostic tests or treatments that may be addressed by these guidelines?

No

Yes

If yes, please explain:

As a medical doctor, I am involved in the management of VTE in patients with cancer and prescribe treatments for cancer-associated VTE. I also recommend how to manage a suspected VTE in patients with cancer including diagnostic approaches.

## Expected Interests

10. Do you expect new financial or nonfinancial interests relevant to the topic of these guidelines not already declared in Part A or Part B of this form?

No

Yes

If yes, please describe:

## Part C. Summary (ASH Internal Use)

ASH will review your disclosures and summarize here interests that are judged to be current, material, and with an affected company. You will then be invited to review our determinations and to agree to make all parts of this form (A, B and C) publically available.

|                            |                                                                            |
|----------------------------|----------------------------------------------------------------------------|
| Name of guideline panel(s) | Guideline Panel on Prevention and Treatment of VTE in Patients with Cancer |
|----------------------------|----------------------------------------------------------------------------|

| <i>Approved to participate?</i> | <i>Status</i>       | <i>Recusal may be required?</i> | <i>Reviewer Name and Date</i> | <i>Notes</i>                                                 |
|---------------------------------|---------------------|---------------------------------|-------------------------------|--------------------------------------------------------------|
| Yes                             | Conflicted minority | Yes                             | 04/20/2015;<br>5/5/2015       |                                                              |
| Yes                             |                     |                                 | 6/1/2020<br>Alexander         | On 5/28/2020, Dr. Ay confirmed all information in this form. |
|                                 |                     |                                 |                               |                                                              |
|                                 |                     |                                 |                               |                                                              |

If status is conflicted minority, summarize all current material interests in affected companies:

| <i>Company</i> | <i>Description</i>                                    | <i>Disclosure Date</i> | <i>ASH Notes</i>                     |
|----------------|-------------------------------------------------------|------------------------|--------------------------------------|
| BMS            | Personal income from participation on speakers bureau | 04/14/2015             | COI: Pfizer and BMS market apixaban. |
| Pfizer         | Personal income from participation on speakers bureau | 04/14/2015             | COI: Pfizer and BMS market apixaban. |
| Bayer Austria  | Personal income from participation on speakers bureau | 04/14/2015             | COI: Bayer markets rivaroxaban.      |
|                |                                                       |                        |                                      |

Notes:

|  |
|--|
|  |
|--|



# ASH Guideline Panel Declarations of Interest Form

## Part A. Material Interests in Companies

### Equity

1. Do you currently or in the past 24 months have you had equity in any for-profit company that develops, produces, markets, or distributes drugs, devices, services, or therapies used to diagnose, treat, monitor, manage, or alleviate health conditions? Equity includes stock, stock options, and other ownership interests but excludes diversified mutual fund shares.

No

Yes, as described below:

Add rows as needed for each equity interest.

| <i>Company</i> | <i>Description</i> | <i>Date Divested</i> | <i>For ASH Internal Use</i> |
|----------------|--------------------|----------------------|-----------------------------|
|                |                    |                      |                             |
|                |                    |                      |                             |

### Patents and Royalties

2. Do you currently or in the past 24 months have you owned patents for or received royalties from any intellectual property or product used to diagnose, treat, monitor, manage, or alleviate health conditions?

No

Yes, as described below:

Add rows as needed for each patent or royalty interest.

| <i>Company</i> | <i>Description</i> | <i>Date Divested</i> | <i>For ASH Internal Use</i> |
|----------------|--------------------|----------------------|-----------------------------|
|                |                    |                      |                             |
|                |                    |                      |                             |

## Personal Income or Other Remuneration

3. Do you currently or in the past 24 months have you received personal income or other remuneration (e.g., reimbursement or financial support for the costs of travel) from any for-profit company that develops, produces, markets, or distributes drugs, devices, services, or therapies used to diagnose, treat, monitor, manage, or alleviate health conditions?

No

Yes, as described below:

Column 1 Name the company.

Column 2 Describe the activity for which you received income or other remuneration, e.g., employment, consultancy, speakers bureau involvement, service on an advisory committee or board, expert testimony.

Column 3 Indicate when the activity ended, if applicable. (If the activity has not yet ended, indicate “current” or “ongoing.”)

Add rows as needed for each activity.

To report activities that generate revenues for your institution, see Part B, Question 4.

| <i>Company</i> | <i>Description</i> | <i>End Date</i> | <i>For ASH Internal Use</i> |
|----------------|--------------------|-----------------|-----------------------------|
|                |                    |                 |                             |
|                |                    |                 |                             |

## Industry-Funded Research

4. Do you currently or in the past 24 months have you been involved in research funded or supported (e.g., in kind support) by any for-profit company that develops, produces, markets, or distributes drugs, devices, services, or therapies used to diagnose, treat, monitor, manage, or alleviate health conditions?

No

Yes, as described below:

Column 1 Name the company funding or supporting the research.

Column 2 Briefly describe the research project. Indicate if funding or support goes to you directly or to your institution.

Column 3 Describe your role: (a) national or overall principal investigator, (b) member of a steering committee of a study that does not have a principal investigator, (c) site or local investigator. If other than these options, please describe.

Column 4 Indicate when your involvement ended, if applicable. (If your involvement has not yet ended, indicate “current” or “ongoing.”)

Add rows as needed for each research project.

| <i>Company</i> | <i>Description of Research</i>                                                                                     | <i>My Role</i> | <i>End Date</i> | <i>For ASH Internal Use</i>                                                                                                                                 |
|----------------|--------------------------------------------------------------------------------------------------------------------|----------------|-----------------|-------------------------------------------------------------------------------------------------------------------------------------------------------------|
| LEO Pharma     | Tinzaparin in patient undergoing colon surgery. In-kind support (tinzaparin provided). Funding goes to institution | PI             | ongoing         | COI even though funding goes to his institution, Leo is an affected company, (markets tinzaparin) + leadership role + Dr. Carrier’s research is VTE related |
| BMS            | Apixaban in patients undergoing chemotherapy. In-kind support (apixaban provided). Funding goes to institution     | PI             | ongoing         | COI, even though funding goes to his institution: affected company (BMS markets apixaban) + leadership role                                                 |
|                |                                                                                                                    |                |                 |                                                                                                                                                             |
|                |                                                                                                                    |                |                 |                                                                                                                                                             |

### My Partner’s or Spouse’s Interests

5. Currently or in the past 24 months has *your partner or spouse* had any of the interests described in questions 1-4?

No

Yes, as described below:

Add rows as needed for each interest.

| <i>Company</i> | <i>Description</i> | <i>End Date</i> | <i>For ASH Internal Use</i> |
|----------------|--------------------|-----------------|-----------------------------|
|                |                    |                 |                             |
|                |                    |                 |                             |

## Part B. Interests That Are Not Mainly Financial

You have been invited by ASH to participate in the development of clinical practice guidelines on the following topic(s):

Prevention and Treatment of VTE in Patients with Cancer

The questions that follow are designed to elicit information about personal beliefs, intellectual positions or opinions, institutional relationships, and other interests that are not mainly financial and that may be relevant to guidelines on the above topic(s).

### Personal Beliefs

1. Do you have strongly held beliefs related to the topic of these guidelines?

No

Yes

If yes, please explain:

### Previously Published Opinions

2. Have you ever authored, coauthored, or publicly provided an opinion related to the topic of these guidelines, e.g., a clinical practice guideline, textbook, review article, meeting poster or presentation, grand rounds talk, letter to the editor?

No

Yes

If yes, what were those views and where were they made?

International Society of Thrombosis and Haemostasis sub-committee Thrombosis & Malignancy  
Guidance documents (challenges, upper extremity DVT and incidental DVT): J Thromb Haemost.  
2014 May;12(5):796-800; J Thromb Haemost. 2013 Sep;11(9):1760-5.

## Research

3. Currently or in the past 24 months, have you been involved in a leadership role in any research project not already reported under Part A, Question 4, relevant to the topic of these guidelines, e.g., a research project funded by a nonprofit or governmental organization?

- No
- Yes, as described below:

Column 1 Name the entity funding the research.

Column 2 Describe the research project.

Column 3 Describe your role: (a) national or overall principal investigator, (b) member of a steering committee of a study that does not have a principal investigator, (c) site or local investigator. If other than these options, please describe.

Column 4 Indicate when your involvement ended, if applicable. (If your involvement has not yet ended, indicate “current” or “ongoing.”)

Add rows as needed for each research project.

| <i>Funder</i>                                                                                 | <i>Description of Research</i>    | <i>My Role</i> | <i>End Date</i> |
|-----------------------------------------------------------------------------------------------|-----------------------------------|----------------|-----------------|
| Both projects under Part A Question 4 are funded by the Canadian Institute of Health Research | See description Part A Question 4 | PI             | ongoing         |
|                                                                                               |                                   |                |                 |

## Institutional Relationships

4. Do you generate revenues or nonfinancial benefits for your institution by teaching, speaking, consulting, testifying, writing, or otherwise sharing your knowledge or opinions about this guideline topic?

- Don't know
- No
- Yes

If yes, please explain:

5. Could your institution benefit or be harmed by recommendations of guidelines on this topic?

Don't know

No

Yes

If yes, please explain:

## Career Advancement

6. How would you characterize the support you would receive from your primary mentor, institution, or other entities if your work on this panel or authorship of these guidelines generated a strong reaction from peers outside your institution?

Excellent support from the Ottawa Hospital Research Institute

## Advocacy and Policy Positions

7. Do you work for or are you a member of an organization with a stated position related to the topic of these guidelines, e.g., position statement, editorial, blog, amicus brief, or legislature or legal testimony?

No

Yes

If yes, are you involved in formulating or voting for positions?

No

Yes

If yes, could recommendations of these guidelines conflict with policies you have promoted or are obligated to follow?

Don't know or not applicable

No

Yes

If yes, please explain:

## Professional Specialty

8. What is your primary clinical specialty or subspecialty? Hematology



9. Do you prescribe or otherwise recommend diagnostic tests or treatments that may be addressed by these guidelines?

No

Yes

If yes, please explain: I am a Hematologist specializing in Thrombosis Medicine

### Expected Interests

10. Do you expect new financial or nonfinancial interests relevant to the topic of these guidelines not already declared in Part A or Part B of this form?

No

Yes

If yes, please describe:

## Part C. Summary (ASH Internal Use)

ASH will review your disclosures and summarize here interests that are judged to be current, material, and with an affected company. You will then be invited to review our determinations and to agree to make all parts of this form (A, B and C) publically available.

|                            |                                                                            |
|----------------------------|----------------------------------------------------------------------------|
| Name of guideline panel(s) | Guideline Panel on Prevention and Treatment of VTE in Patients with Cancer |
|----------------------------|----------------------------------------------------------------------------|

| <i>Approved to participate?</i> | <i>Status</i>       | <i>Recusal may be required?</i> | <i>Reviewer Name and Date</i> | <i>Notes</i>                                                      |
|---------------------------------|---------------------|---------------------------------|-------------------------------|-------------------------------------------------------------------|
| Yes                             | Conflicted minority | No                              | 04/15/2015;<br>4/25/2015      |                                                                   |
| Yes                             | Conflicted minority |                                 | 6/1/2020<br>Alexander         | On 5/26/2020, Dr. Carrier confirmed all information in this form. |
|                                 |                     |                                 |                               |                                                                   |

If status is conflicted minority, summarize all current material interests in affected companies:

| <i>Company</i> | <i>Description</i>                                                                                                                  | <i>Disclosure Date</i> | <i>ASH Notes</i>                        |
|----------------|-------------------------------------------------------------------------------------------------------------------------------------|------------------------|-----------------------------------------|
| Leo Pharma     | Leadership role for a study of tinzaparin in patients undergoing colon surgery receiving in-kind support from Leo Pharma            | 04/12/2015             | Leo markets tinzaparin.                 |
| BMS            | Leadership role for a study of apixaban in patients undergoing chemotherapy receiving in-kind support from BMS                      | 04/12/2015             | BMS markets apixaban.                   |
| Pfizer         | Leadership role for a study of dalteparin in obese patients with cancer-associated thrombosis receiving in-kind support from Pfizer | 5/26/2020              | Pfizer markets apixaban and dalteparin. |

Notes:

|  |
|--|
|  |
|--|

## Part D. New Declarations

The following interests were disclosed after appointment:

| <i>Company</i>       | <i>Description</i>                                                                                                                                                                                                                                                                                                                                                                                                                                                                                                        | <i>Disclosure Date</i> | <i>ASH Internal Notes</i>                                                                                                                                                         |
|----------------------|---------------------------------------------------------------------------------------------------------------------------------------------------------------------------------------------------------------------------------------------------------------------------------------------------------------------------------------------------------------------------------------------------------------------------------------------------------------------------------------------------------------------------|------------------------|-----------------------------------------------------------------------------------------------------------------------------------------------------------------------------------|
| Bristol Myers Squibb | This activity ended in 2019.                                                                                                                                                                                                                                                                                                                                                                                                                                                                                              | 5/26/2020              | This is an update to Part A, Question 4.                                                                                                                                          |
| Pfizer               | Dalteparin in obese patients with cancer-associated thrombosis. In-kind support (dalteparin provided). Funding goes to institution. Dr. Carrier is the PI.                                                                                                                                                                                                                                                                                                                                                                | 5/26/2020              | COI. Pfizer markets apixaban, the subject of the research is related to the guideline topic, and Dr. Carrier has a leadership role. However, all funding goes to his institution. |
| N/A                  | <p>Kimpton M, Carrier M. What's new in the prevention and treatment of cancer-associated thrombosis? Hematology Am Soc Hematol Educ Program. 2019 Dec 6;2019(1):158-166. Do</p> <p>Blood: Kraaijpoel N, Carrier M. How I treat Cancer-Associated Venous Thromboembolism. Blood. 2019 Jan 24;133(4):291-298</p> <p>ISTH: Wang TF, Zwicker JI, Ay C, Pabinger I, Falanga A, Antic D, Noble S, Khorana AA, Carrier M, Meyer G. The use of direct oral anticoagulants for primary thromboprophylaxis in ambulatory cancer</p> | 5/26/2020              | This is an update to Part B, Question 2.                                                                                                                                          |

| <i>Company</i> | <i>Description</i>                                                                                                                                                                                                                                                                                                      | <i>Disclosure Date</i> | <i>ASH Internal Notes</i> |
|----------------|-------------------------------------------------------------------------------------------------------------------------------------------------------------------------------------------------------------------------------------------------------------------------------------------------------------------------|------------------------|---------------------------|
|                | <p>patients: Guidance from the SSC of the ISTH.</p> <p>ISTH: Khorana AA, Noble S, Lee AYY, Soff G, Meyer G, O'Connell C, Carrier M. Role of direct oral anticoagulants in the treatment of cancer-associated venous thromboembolism: guidance from the SSC of the ISTH. J Thromb Haemost. 2018 Sep;16(9):1891-1894.</p> |                        |                           |



# ASH Guideline Panel Declarations of Interest Form

## Part A. Material Interests in Companies

### Equity

1. Do you currently or in the past 24 months have you had equity in any for-profit company that develops, produces, markets, or distributes drugs, devices, services, or therapies used to diagnose, treat, monitor, manage, or alleviate health conditions? Equity includes stock, stock options, and other ownership interests but excludes diversified mutual fund shares.

No

Yes, as described below:

Add rows as needed for each equity interest.

| <i>Company</i> | <i>Description</i> | <i>Date Divested</i> | <i>For ASH Internal Use</i> |
|----------------|--------------------|----------------------|-----------------------------|
|                |                    |                      |                             |
|                |                    |                      |                             |

### Patents and Royalties

2. Do you currently or in the past 24 months have you owned patents for or received royalties from any intellectual property or product used to diagnose, treat, monitor, manage, or alleviate health conditions?

No

Yes, as described below:

Add rows as needed for each patent or royalty interest.

| <i>Company</i> | <i>Description</i> | <i>Date Divested</i> | <i>For ASH Internal Use</i> |
|----------------|--------------------|----------------------|-----------------------------|
|                |                    |                      |                             |
|                |                    |                      |                             |

### Personal Income or Other Remuneration

3. Do you currently or in the past 24 months have you received personal income or other remuneration (e.g., reimbursement or financial support for the costs of travel) from any for-profit company that develops, produces, markets, or distributes drugs, devices, services, or therapies used to diagnose, treat, monitor, manage, or alleviate health conditions?

No

Yes, as described below:

Column 1 Name the company.

Column 2 Describe the activity for which you received income or other remuneration, e.g., employment, consultancy, speakers bureau involvement, service on an advisory committee or board, expert testimony.

Column 3 Indicate when the activity ended, if applicable. (If the activity has not yet ended, indicate “current” or “ongoing.”)

Add rows as needed for each activity.

To report activities that generate revenues for your institution, see Part B, Question 4.

| <i>Company</i>    | <i>Description</i>           | <i>End Date</i>                 | <i>For ASH Internal Use</i> |
|-------------------|------------------------------|---------------------------------|-----------------------------|
| Bayer Health Care | Consultancy                  | From 11-DEC-2014 to 11-DEC-2014 | Ended before appointment    |
| Grifols SPA       | Service on an advisory board | From 10-NOV-2014 to 10-NOV-2014 | Ended before appointment    |
|                   |                              |                                 |                             |
|                   |                              |                                 |                             |

### Industry-Funded Research

4. Do you currently or in the past 24 months have you been involved in research funded or supported (e.g., in kind support) by any for-profit company that develops, produces, markets, or distributes drugs, devices, services, or therapies used to diagnose, treat, monitor, manage, or alleviate health conditions?

No

Yes, as described below:

Column 1 Name the company funding or supporting the research.

Column 2 Briefly describe the research project. Indicate if funding or support goes to you directly or to your institution.

Column 3 Describe your role: (a) national or overall principal investigator, (b) member of a steering committee of a study that does not have a principal investigator, (c) site or local investigator. If other than these options, please describe.

Column 4 Indicate when your involvement ended, if applicable. (If your involvement has not yet ended, indicate “current” or “ongoing.”)

Add rows as needed for each research project.

| <i>Company</i>                                                          | <i>Description of Research</i>                                                                                                    | <i>My Role</i>                                  | <i>End Date</i> | <i>For ASH Internal Use</i>                                                                                                                                                                          |
|-------------------------------------------------------------------------|-----------------------------------------------------------------------------------------------------------------------------------|-------------------------------------------------|-----------------|------------------------------------------------------------------------------------------------------------------------------------------------------------------------------------------------------|
| Thrombosis Research Institute, London.<br>(Funding goes to institution) | Phase IV registry study to describe the acute and long term management, clinical and economic outcomes in patients with acute VTE | Local study coordinator                         | Ongoing         | The Thrombosis Research Institute is a nonprofit organization.                                                                                                                                       |
| Daiichi-Sankyo<br>(Funding went to institution)                         | Phase IV registry study to describe the acute and long term management, clinical and economic outcomes in patients with acute VTE | Local sub-investigator                          | 2014            | Ended before appointment                                                                                                                                                                             |
| Bayer Health Care<br>(Funding goes to institution)                      | Phase III RCT on the long-term treatment of VTE with aspirin vs. rivaroxaban                                                      | Local sub-investigator                          | Ongoing         | Bayer markets rivaroxaban. However, all funding for this trial goes to Dr. DiNisio’s institution, and he does not have a leadership role.                                                            |
| Daiichi-Sankyo<br>(Funding goes to institution)                         | Phase III RCT on the treatment of VTE in cancer patients randomized to edoxaban or LMWH                                           | Member of the Steering Committee (study has PI) | Ongoing         | Daiichi-Sankyo markets edoxaban. However, all funding for this trial goes to Dr. DiNisio’s institution, and he does not have a leadership role (he is on the steering committee, but there is a PI). |

## My Partner's or Spouse's Interests

5. Currently or in the past 24 months has *your partner or spouse* had any of the interests described in questions 1-4?

No

Yes, as described below:

Add rows as needed for each interest.

| <i>Company</i> | <i>Description</i> | <i>End Date</i> | <i>For ASH Internal Use</i> |
|----------------|--------------------|-----------------|-----------------------------|
|                |                    |                 |                             |
|                |                    |                 |                             |
|                |                    |                 |                             |



## Part B. Interests That Are Not Mainly Financial

You have been invited by ASH to participate in the development of clinical practice guidelines on the following topic(s):

Prevention and Treatment of VTE in Patients with Cancer

The questions that follow are designed to elicit information about personal beliefs, intellectual positions or opinions, institutional relationships, and other interests that are not mainly financial and that may be relevant to guidelines on the above topic(s).

### Personal Beliefs

1. Do you have strongly held beliefs related to the topic of these guidelines?

No

Yes

If yes, please explain:

### Previously Published Opinions

2. Have you ever authored, coauthored, or publicly provided an opinion related to the topic of these guidelines, e.g., a clinical practice guideline, textbook, review article, meeting poster or presentation, grand rounds talk, letter to the editor?

No

Yes

If yes, what were those views and where were they made?

I have authored and co-authored Cochrane reviews and other review articles on the topic of these guidelines. I also gave poster or meeting presentations.

### Research

3. Currently or in the past 24 months, have you been involved in a leadership role in any research project not already reported under Part A, Question 4, relevant to the topic of these guidelines, e.g., a research project funded by a nonprofit or governmental organization?

- No
- Yes, as described below:

Column 1 Name the entity funding the research.

Column 2 Describe the research project.

Column 3 Describe your role: (a) national or overall principal investigator, (b) member of a steering committee of a study that does not have a principal investigator, (c) site or local investigator. If other than these options, please describe.

Column 4 Indicate when your involvement ended, if applicable. (If your involvement has not yet ended, indicate “current” or “ongoing.”)

Add rows as needed for each research project.

| <i>Funder</i>                                     | <i>Description of Research</i>                                                                                        | <i>My Role</i>          | <i>End Date</i> |
|---------------------------------------------------|-----------------------------------------------------------------------------------------------------------------------|-------------------------|-----------------|
| University G.<br>D'Annunzio<br>(Study not funded) | Observational study registry on the treatment of incidental PE in cancer patients                                     | Local study coordinator | Ongoing         |
| University G.<br>D'Annunzio<br>(Study not funded) | Observational study on the role of D-dimer test and clinical decision rule in the diagnosis of DVT in cancer patients | Local study coordinator | Ongoing         |
| University G.<br>D'Annunzio<br>(Study not funded) | Observational study about the use and outcomes of thromboprophylaxis for VTE in hospitalized cancer patients          | Local study coordinator | Ongoing         |
|                                                   |                                                                                                                       |                         |                 |

## Institutional Relationships

4. Do you generate revenues or nonfinancial benefits for your institution by teaching, speaking, consulting, testifying, writing, or otherwise sharing your knowledge or opinions about this guideline topic?

- Don't know
- No
- Yes

If yes, please explain:

5. Could your institution benefit or be harmed by recommendations of guidelines on this topic?

Don't know

No

Yes

If yes, please explain:

## Career Advancement

6. How would you characterize the support you would receive from your primary mentor, institution, or other entities if your work on this panel or authorship of these guidelines generated a strong reaction from peers outside your institution?

I believe I would not get any reaction. If any, I would get full support from my primary mentor and institution in these cases.

## Advocacy and Policy Positions

7. Do you work for or are you a member of an organization with a stated position related to the topic of these guidelines, e.g., position statement, editorial, blog, amicus brief, or legislature or legal testimony?

No

Yes

If yes, are you involved in formulating or voting for positions?

No

Yes

If yes, could recommendations of these guidelines conflict with policies you have promoted or are obligated to follow?

Don't know or not applicable

No

Yes

If yes, please explain:

## Professional Specialty

8. What is your primary clinical specialty or subspecialty?

Internal Medicine and Vascular Medicine.

9. Do you prescribe or otherwise recommend diagnostic tests or treatments that may be addressed by these guidelines?

No

Yes

If yes, please explain:

As part of my routine clinical practice in the outpatient service of Vascular Medicine I may have to advise VTE thromboprophylaxis or treatment in cancer patients as indicated.

## Expected Interests

10. Do you expect new financial or nonfinancial interests relevant to the topic of these guidelines not already declared in Part A or Part B of this form?

No

Yes

If yes, please describe:

## Part C. Summary (ASH Internal Use)

ASH will review your disclosures and summarize here interests that are judged to be current, material, and with an affected company. You will then be invited to review our determinations and to agree to make all parts of this form (A, B and C) publically available.

|                            |                                                                            |
|----------------------------|----------------------------------------------------------------------------|
| Name of guideline panel(s) | Guideline Panel on Prevention and Treatment of VTE in Patients with Cancer |
|----------------------------|----------------------------------------------------------------------------|

| <i>Approved to participate?</i> | <i>Status</i>         | <i>Recusal may be required?</i> | <i>Reviewer Name and Date</i>            | <i>Notes</i>                                                       |
|---------------------------------|-----------------------|---------------------------------|------------------------------------------|--------------------------------------------------------------------|
| Yes                             | Unconflicted majority | No                              | 5/1/2015;<br>5/5/2015                    |                                                                    |
| Yes                             | Conflicted minority   | Yes                             | 2/15/2017 Alexander;<br>2/21/2017 Kunkle | New interests disclosed. See Part D.                               |
| Yes                             | Conflicted minority   | Yes                             | 2/12/2018 Alexander                      | New interests disclosed. See Part D.                               |
| Yes                             | Conflicted minority   | Yes                             | 5/22/2020 Alexander                      | On 5/22/2020, Dr. Di Nisio confirmed all information in this form. |

If status is conflicted minority, summarize all current material interests in affected companies:

| <i>Company</i> | <i>Description</i>                                              | <i>Disclosure Date</i> | <i>ASH Notes</i>                                |
|----------------|-----------------------------------------------------------------|------------------------|-------------------------------------------------|
| Daiichi Sankyo | Direct payment for service on an advisory board (Feb 2016)      | 2/3/2017               | Daiichi Sankyo markets edoxaban.                |
| Daiichi Sankyo | Direct payment for consulting                                   | 2/3/2017               | Daiichi Sankyo markets edoxaban.                |
| Pfizer         | Direct payment for service on an advisory board (November 2016) | 2/3/2017               | Pfizer markets apixaban.                        |
| Daiichi Sankyo | Direct payment for consulting                                   | 2/9/2018               | COI. Daiichi Sankyo markets edoxaban.           |
| Aspen          | Direct payment for consulting                                   | 2/9/2018               | COI. Aspen markets danaparoid and fondaparinux. |

| <i>Company</i>    | <i>Description</i>                              | <i>Disclosure Date</i> | <i>ASH Notes</i>                |
|-------------------|-------------------------------------------------|------------------------|---------------------------------|
| Pfizer            | Direct payment for service on an advisory board | 2/9/2018               | COI. Pfizer markets apixaban.   |
| Bayer Health Care | Direct payment for consulting                   | 2/9/2018               | COI. Bayer markets rivaroxaban. |

Notes:

|  |
|--|
|  |
|--|

## Part D. New Declarations

The following interests were disclosed after appointment:

| <i>Company</i>    | <i>Description</i>                                                       | <i>Disclosure Date</i> | <i>ASH Internal Notes</i>                       |
|-------------------|--------------------------------------------------------------------------|------------------------|-------------------------------------------------|
| Daiichi Sankyo    | Direct payment for service on an advisory board (Feb 2016)               | 2/3/2017               | COI. Daiichi Sankyo markets edoxaban.           |
| Daiichi Sankyo    | Direct payment for consulting                                            | 2/3/2017               | COI. Daiichi Sankyo markets edoxaban.           |
| Pfizer            | Direct payment for service on an advisory board                          | 2/3/2017               | COI. Pfizer markets apixaban.                   |
| Daiichi Sankyo    | Direct payment for consulting                                            | 2/9/2018               | COI. Daiichi Sankyo markets edoxaban.           |
| Aspen             | Direct payment for consulting                                            | 2/9/2018               | COI. Aspen markets danaparoid and fondaparinux. |
| Pfizer            | Direct payment for service on an advisory board                          | 2/9/2018               | COI. Pfizer markets apixaban.                   |
| Bayer Health Care | Direct payment for consulting                                            | 2/9/2018               | COI. Bayer markets rivaroxaban.                 |
| Daiichi Sankyo    | Direct payment for speaking and consulting.                              | 5/22/2020              | COI. Daiichi Sankyo markets edoxaban.           |
| Aspen             | Direct payment for consulting                                            | 5/22/2020              | COI. Aspen markets fondaparinux and danaparoid. |
| Pfizer            | Direct payment for service on an advisory board and consulting.          | 5/22/2020              | COI. Pfizer markets apixaban.                   |
| Daiichi Sankyo    | Direct payment for consulting, speaking and service on an advisory board | 5/22/2020              | COI. Daiichi Sankyo markets edoxaban.           |
| Bayer             | Direct payment for service on an advisory board                          | 5/22/2020              | COI. Bayer markets rivaroxaban.                 |

| <i>Company</i>       | <i>Description</i>                           | <i>Disclosure Date</i> | <i>ASH Internal Notes</i>                                                                                           |
|----------------------|----------------------------------------------|------------------------|---------------------------------------------------------------------------------------------------------------------|
| Werfen               | Direct payment for consulting                | 5/22/2020              | Not a COI. Werfen markets D-dimer assays, however Werfen does not market any products used in the treatment of VTE. |
| Bristol Myers Squibb | Direct payment for service on advisory board | 5/22/2020              | COI. BMS markets apixaban.                                                                                          |
| Sanofi-Aventis       | Direct payment for consulting                | 5/22/2020              | COI. Sanofi markets enoxaparin.                                                                                     |



| <i>Company</i>                         | <i>Description</i>                                                                                                                                                                                                                                                                                                            | <i>Disclosure Date</i> | <i>ASH Internal Notes</i>                |
|----------------------------------------|-------------------------------------------------------------------------------------------------------------------------------------------------------------------------------------------------------------------------------------------------------------------------------------------------------------------------------|------------------------|------------------------------------------|
| Thrombosis Research Institute, London. | <p>Phase IV registry study to describe the acute and long term management, clinical and economic outcomes in patients with acute VTE. This study was published in 2019.</p> <p>Observational study registry on the treatment of incidental PE in cancer patients was published in JCO 2019 (Kraaijpoel N et al, JCO 2019)</p> | 5/22/2020              | This is an update to Part A, Question 4. |
| Bayer Health Care                      | <p>Phase III RCT on the long-term treatment of VTE with aspirin vs. rivaroxaban. This study was published in 2018.</p> <p>Observational study about the use and outcomes of thromboprophylaxis for VTE in hospitalized cancer patients was published in Th Res 2018 (Di Nisio M et al, Th Res 2018)</p>                       | 5/22/2020              | This is an update to Part A, Question 4. |



# ASH Guideline Panel Declarations of Interest Form

## Part A. Material Interests in Companies

### Equity

1. Do you currently or in the past 24 months have you had equity in any for-profit company that develops, produces, markets, or distributes drugs, devices, services, or therapies used to diagnose, treat, monitor, manage, or alleviate health conditions? Equity includes stock, stock options, and other ownership interests but excludes diversified mutual fund shares.

No

Yes, as described below:

Add rows as needed for each equity interest.

| <i>Company</i> | <i>Description</i> | <i>Date Divested</i> | <i>For ASH Internal Use</i> |
|----------------|--------------------|----------------------|-----------------------------|
|                |                    |                      |                             |
|                |                    |                      |                             |

### Patents and Royalties

2. Do you currently or in the past 24 months have you owned patents for or received royalties from any intellectual property or product used to diagnose, treat, monitor, manage, or alleviate health conditions?

No

Yes, as described below:

Add rows as needed for each patent or royalty interest.

| <i>Company</i> | <i>Description</i> | <i>Date Divested</i> | <i>For ASH Internal Use</i> |
|----------------|--------------------|----------------------|-----------------------------|
|                |                    |                      |                             |
|                |                    |                      |                             |

### Personal Income or Other Remuneration

3. Do you currently or in the past 24 months have you received personal income or other remuneration (e.g., reimbursement or financial support for the costs of travel) from any for-profit company that develops, produces, markets, or distributes drugs, devices, services, or therapies used to diagnose, treat, monitor, manage, or alleviate health conditions?

No

Yes, as described below:

Column 1 Name the company.

Column 2 Describe the activity for which you received income or other remuneration, e.g., employment, consultancy, speakers bureau involvement, service on an advisory committee or board, expert testimony.

Column 3 Indicate when the activity ended, if applicable. (If the activity has not yet ended, indicate “current” or “ongoing.”)

Add rows as needed for each activity.

To report activities that generate revenues for your institution, see Part B, Question 4.

| <i>Company</i> | <i>Description</i> | <i>End Date</i> | <i>For ASH Internal Use</i> |
|----------------|--------------------|-----------------|-----------------------------|
|                |                    |                 |                             |
|                |                    |                 |                             |
|                |                    |                 |                             |

### Industry-Funded Research

4. Do you currently or in the past 24 months have you been involved in research funded or supported (e.g., in kind support) by any for-profit company that develops, produces, markets, or distributes drugs, devices, services, or therapies used to diagnose, treat, monitor, manage, or alleviate health conditions?

No

Yes, as described below:

Column 1 Name the company funding or supporting the research.

Column 2 Briefly describe the research project. Indicate if funding or support goes to you directly or to your institution.

Column 3 Describe your role: (a) national or overall principal investigator, (b) member of a steering committee of a study that does not have a principal investigator, (c) site or local investigator. If other than these options, please describe.

Column 4 Indicate when your involvement ended, if applicable. (If your involvement has not yet ended, indicate "current" or "ongoing.")

Add rows as needed for each research project.

| <i>Company</i>                  | <i>Description of Research</i>                                                                           | <i>My Role</i> | <i>End Date</i> | <i>For ASH Internal Use</i>                                                                         |
|---------------------------------|----------------------------------------------------------------------------------------------------------|----------------|-----------------|-----------------------------------------------------------------------------------------------------|
| Gilead<br>(CIHR-industry grant) | RCT of tenofovir for patients with occult hepatitis B infection who are receiving rituximab for lymphoma | Co-PI          | 2016            | NO COI: Gilead has no products that could be affected by guidelines on VTE in patients with cancer. |
|                                 |                                                                                                          |                |                 |                                                                                                     |
|                                 |                                                                                                          |                |                 |                                                                                                     |

### My Partner's or Spouse's Interests

5. Currently or in the past 24 months has *your partner or spouse* had any of the interests described in questions 1-4?

No

Yes, as described below:

Add rows as needed for each interest.

| <i>Company</i> | <i>Description</i> | <i>End Date</i> | <i>For ASH Internal Use</i> |
|----------------|--------------------|-----------------|-----------------------------|
|                |                    |                 |                             |
|                |                    |                 |                             |
|                |                    |                 |                             |

## Part B. Interests That Are Not Mainly Financial

You have been invited by ASH to participate in the development of clinical practice guidelines on the following topic(s):

Prevention and Treatment of VTE in Patients with Cancer

The questions that follow are designed to elicit information about personal beliefs, intellectual positions or opinions, institutional relationships, and other interests that are not mainly financial and that may be relevant to guidelines on the above topic(s).

### Personal Beliefs

1. Do you have strongly held beliefs related to the topic of these guidelines?

No

Yes

If yes, please explain:

### Previously Published Opinions

2. Have you ever authored, coauthored, or publicly provided an opinion related to the topic of these guidelines, e.g., a clinical practice guideline, textbook, review article, meeting poster or presentation, grand rounds talk, letter to the editor?

No

Yes

If yes, what were those views and where were they made?

### Research

3. Currently or in the past 24 months, have you been involved in a leadership role in any research project not already reported under Part A, Question 4, relevant to the topic of these guidelines, e.g., a research project funded by a nonprofit or governmental organization?

No

Yes, as described below:

Column 1 Name the entity funding the research.

Column 2 Describe the research project.

Column 3 Describe your role: (a) national or overall principal investigator, (b) member of a steering committee of a study that does not have a principal investigator, (c) site or local investigator. If other than these options, please describe.

Column 4 Indicate when your involvement ended, if applicable. (If your involvement has not yet ended, indicate "current" or "ongoing.")

Add rows as needed for each research project.

| <i>Funder</i> | <i>Description of Research</i> | <i>My Role</i> | <i>End Date</i> |
|---------------|--------------------------------|----------------|-----------------|
|               |                                |                |                 |
|               |                                |                |                 |
|               |                                |                |                 |
|               |                                |                |                 |

## Institutional Relationships

4. Do you generate revenues or nonfinancial benefits for your institution by teaching, speaking, consulting, testifying, writing, or otherwise sharing your knowledge or opinions about this guideline topic?

Don't know

No

Yes

If yes, please explain:

5. Could your institution benefit or be harmed by recommendations of guidelines on this topic?

Don't know

No

Yes

If yes, please explain:

## Career Advancement

6. How would you characterize the support you would receive from your primary mentor, institution, or other entities if your work on this panel or authorship of these guidelines generated a strong reaction from peers outside your institution?

My mentors and institution are supportive of my academic work including participation in guideline development. I anticipate strong support.

## Advocacy and Policy Positions

7. Do you work for or are you a member of an organization with a stated position related to the topic of these guidelines, e.g., position statement, editorial, blog, amicus brief, or legislature or legal testimony?

No

Yes

If yes, are you involved in formulating or voting for positions?

No

Yes

If yes, could recommendations of these guidelines conflict with policies you have promoted or are obligated to follow?

Don't know or not applicable

No

Yes

If yes, please explain:

## Professional Specialty

8. What is your primary clinical specialty or subspecialty?

Hematology (I practice predominantly malignant hematology with a small amount of general, in-pt hematology as well).

9. Do you prescribe or otherwise recommend diagnostic tests or treatments that may be addressed by these guidelines?

No

Yes

If yes, please explain:

I occasionally manage patients in my own practice with cancer associated VTE. As a member of an in-patient general hematology consult service I also occasionally provide advice to colleagues regarding the management of cancer associated VTEs.

## Expected Interests

10. Do you expect new financial or nonfinancial interests relevant to the topic of these guidelines not already declared in Part A or Part B of this form?

No

Yes

If yes, please describe:



## Part C. Summary (ASH Internal Use)

ASH will review your disclosures and summarize here interests that are judged to be current, material, and with an affected company. You will then be invited to review our determinations and to agree to make all parts of this form (A, B and C) publically available.

|                            |                                                                            |
|----------------------------|----------------------------------------------------------------------------|
| Name of guideline panel(s) | Guideline Panel on Prevention and Treatment of VTE in Patients with Cancer |
|----------------------------|----------------------------------------------------------------------------|

| <i>Approved to participate?</i> | <i>Status</i>         | <i>Recusal may be required?</i> | <i>Reviewer Name and Date</i> | <i>Notes</i>                                                   |
|---------------------------------|-----------------------|---------------------------------|-------------------------------|----------------------------------------------------------------|
| Yes                             | Unconflicted majority | No                              | 4/20/2015;<br>5/5/2015        |                                                                |
| Yes                             |                       |                                 | 6/8/2020<br>Alexander         | On 6/1/2020, Dr. Hicks confirmed all information in this form. |
|                                 |                       |                                 |                               |                                                                |
|                                 |                       |                                 |                               |                                                                |

If status is conflicted minority, summarize all current material interests in affected companies:

| <i>Company</i> | <i>Description</i> | <i>Disclosure Date</i> | <i>ASH Notes</i> |
|----------------|--------------------|------------------------|------------------|
|                |                    |                        |                  |
|                |                    |                        |                  |
|                |                    |                        |                  |
|                |                    |                        |                  |

Notes:

## Part D. New Declarations

The following interests were disclosed after appointment:

| <i>Company</i>      | <i>Description</i>                                                              | <i>Disclosure Date</i> | <i>ASH Internal Notes</i>                                                                 |
|---------------------|---------------------------------------------------------------------------------|------------------------|-------------------------------------------------------------------------------------------|
| Blueprint Medicines | Study of avapritinib for systemic mastocytosis. Dr. Hicks is the local site PI. | 6/1/2020               | Not a COI. Blueprint Medicines does not market any products used in the treatment of VTE. |
|                     |                                                                                 |                        |                                                                                           |



# ASH Guideline Panel Declarations of Interest Form

## Part A. Material Interests in Companies

### Equity

1. Do you currently or in the past 24 months have you had equity in any for-profit company that develops, produces, markets, or distributes drugs, devices, services, or therapies used to diagnose, treat, monitor, manage, or alleviate health conditions? Equity includes stock, stock options, and other ownership interests but excludes diversified mutual fund shares.

No

Yes, as described below:

Add rows as needed for each equity interest.

| <i>Company</i> | <i>Description</i> | <i>Date Divested</i> | <i>For ASH Internal Use</i> |
|----------------|--------------------|----------------------|-----------------------------|
|                |                    |                      |                             |
|                |                    |                      |                             |

### Patents and Royalties

2. Do you currently or in the past 24 months have you owned patents for or received royalties from any intellectual property or product used to diagnose, treat, monitor, manage, or alleviate health conditions?

No

Yes, as described below:

Add rows as needed for each patent or royalty interest.

| <i>Company</i> | <i>Description</i> | <i>Date Divested</i> | <i>For ASH Internal Use</i> |
|----------------|--------------------|----------------------|-----------------------------|
|                |                    |                      |                             |
|                |                    |                      |                             |

## Personal Income or Other Remuneration

3. Do you currently or in the past 24 months have you received personal income or other remuneration (e.g., reimbursement or financial support for the costs of travel) from any for-profit company that develops, produces, markets, or distributes drugs, devices, services, or therapies used to diagnose, treat, monitor, manage, or alleviate health conditions?

No

Yes, as described below:

Column 1 Name the company.

Column 2 Describe the activity for which you received income or other remuneration, e.g., employment, consultancy, speakers bureau involvement, service on an advisory committee or board, expert testimony.

Column 3 Indicate when the activity ended, if applicable. (If the activity has not yet ended, indicate "current" or "ongoing.")

Add rows as needed for each activity.

To report activities that generate revenues for your institution, see Part B, Question 4.

| <i>Company</i>       | <i>Description</i>                                             | <i>End Date</i> | <i>For ASH Internal Use</i>                                                                                                                                                     |
|----------------------|----------------------------------------------------------------|-----------------|---------------------------------------------------------------------------------------------------------------------------------------------------------------------------------|
| Janssen              | Consulting, will co-chair steering committee of upcoming study | current         | COI: Janssen markets rivaroxaban.                                                                                                                                               |
| Leo Pharma           | Consulting, member of steering committee of CATCH trial        | current         | COI: Leo markets tinzaparin, a LMWH.                                                                                                                                            |
| Pfizer               | Consulting                                                     | 2014            | Ended before appointment                                                                                                                                                        |
| Boehringer Ingelheim | Consulting                                                     | 2014            | Ended before appointment                                                                                                                                                        |
| Genentech            | Consulting                                                     | 2014            | Ended before appointment                                                                                                                                                        |
| Daiichi Sankyo       | Consulting                                                     | 2014            | Ended before appointment                                                                                                                                                        |
| Halozyme             | Consulting                                                     | 2014            | Ended before appointment                                                                                                                                                        |
| Angiodynamics        | Consulting                                                     | 2015            | Angiodynamics markets technologies for venous disease and vascular access. However, these products are unlikely to be affected by guidelines on prevention or treatment of VTE. |

## Industry-Funded Research

4. Do you currently or in the past 24 months have you been involved in research funded or supported (e.g., in kind support) by any for-profit company that develops, produces, markets, or distributes drugs, devices, services, or therapies used to diagnose, treat, monitor, manage, or alleviate health conditions?

No

Yes, as described below:

Column 1 Name the company funding or supporting the research.

Column 2 Briefly describe the research project. Indicate if funding or support goes to you directly or to your institution.

Column 3 Describe your role: (a) national or overall principal investigator, (b) member of a steering committee of a study that does not have a principal investigator, (c) site or local investigator. If other than these options, please describe.

Column 4 Indicate when your involvement ended, if applicable. (If your involvement has not yet ended, indicate “current” or “ongoing.”)

Add rows as needed for each research project.

| <i>Company</i> | <i>Description of Research</i> | <i>My Role</i> | <i>End Date</i> | <i>For ASH Internal Use</i> |
|----------------|--------------------------------|----------------|-----------------|-----------------------------|
|                |                                |                |                 |                             |
|                |                                |                |                 |                             |
|                |                                |                |                 |                             |

## My Partner’s or Spouse’s Interests

5. Currently or in the past 24 months has *your partner or spouse* had any of the interests described in questions 1-4?

No

Yes, as described below:

Add rows as needed for each interest.

| <i>Company</i> | <i>Description</i> | <i>End Date</i> | <i>For ASH Internal Use</i> |
|----------------|--------------------|-----------------|-----------------------------|
|                |                    |                 |                             |
|                |                    |                 |                             |

## Part B. Interests That Are Not Mainly Financial

You have been invited by ASH to participate in the development of clinical practice guidelines on the following topic(s):

Prevention and Treatment of VTE in Patients with Cancer

The questions that follow are designed to elicit information about personal beliefs, intellectual positions or opinions, institutional relationships, and other interests that are not mainly financial and that may be relevant to guidelines on the above topic(s).

### Personal Beliefs

1. Do you have strongly held beliefs related to the topic of these guidelines?

No

Yes

If yes, please explain:

I am replying no based on the framing of the question as ‘beliefs’ which would imply an opinion not grounded in fact. I do of course have a scientific viewpoint based on published evidence.

### Previously Published Opinions

2. Have you ever authored, coauthored, or publicly provided an opinion related to the topic of these guidelines, e.g., a clinical practice guideline, textbook, review article, meeting poster or presentation, grand rounds talk, letter to the editor?

No

Yes

If yes, what were those views and where were they made?

I co-chair ISTH clinical guidance statements on related topics and AMA member of ASCO guidelines panel on same topic

### Research

3. Currently or in the past 24 months, have you been involved in a leadership role in any research project not already reported under Part A, Question 4, relevant to the topic of these guidelines, e.g., a research project funded by a nonprofit or governmental organization?

- No
- Yes, as described below:

Column 1 Name the entity funding the research.

Column 2 Describe the research project.

Column 3 Describe your role: (a) national or overall principal investigator, (b) member of a steering committee of a study that does not have a principal investigator, (c) site or local investigator. If other than these options, please describe.

Column 4 Indicate when your involvement ended, if applicable. (If your involvement has not yet ended, indicate "current" or "ongoing.")

Add rows as needed for each research project.

| <i>Funder</i>                   | <i>Description of Research</i>                        | <i>My Role</i> | <i>End Date</i> |
|---------------------------------|-------------------------------------------------------|----------------|-----------------|
| Scott Hamilton CARES Initiative | Pilot study of prophylaxis with aspirin and/or statin | PI             | 2016            |
|                                 |                                                       |                |                 |
|                                 |                                                       |                |                 |
|                                 |                                                       |                |                 |

### Institutional Relationships

4. Do you generate revenues or nonfinancial benefits for your institution by teaching, speaking, consulting, testifying, writing, or otherwise sharing your knowledge or opinions about this guideline topic?

- Don't know
- No
- Yes

If yes, please explain:

Speak widely at conferences and grand rounds on this subject given my expertise in the area.

5. Could your institution benefit or be harmed by recommendations of guidelines on this topic?

- Don't know
- No
- Yes

If yes, please explain:

## Career Advancement

6. How would you characterize the support you would receive from your primary mentor, institution, or other entities if your work on this panel or authorship of these guidelines generated a strong reaction from peers outside your institution?

Institution would remain supportive

## Advocacy and Policy Positions

7. Do you work for or are you a member of an organization with a stated position related to the topic of these guidelines, e.g., position statement, editorial, blog, amicus brief, or legislature or legal testimony?

No

Yes

If yes, are you involved in formulating or voting for positions?

No

Yes

If yes, could recommendations of these guidelines conflict with policies you have promoted or are obligated to follow?

Don't know or not applicable

No

Yes

If yes, please explain:

## Professional Specialty

8. What is your primary clinical specialty or subspecialty?

Oncology

9. Do you prescribe or otherwise recommend diagnostic tests or treatments that may be addressed by these guidelines?

No



Yes

If yes, please explain:

I take care of patients with this illness and of course I will diagnose/treat them appropriately

## Expected Interests

10. Do you expect new financial or nonfinancial interests relevant to the topic of these guidelines not already declared in Part A or Part B of this form?

No

Yes

If yes, please describe:

Not sure, but would assume that I will continue to work in this field and that new opportunities will emerge

## Part C. Summary (ASH Internal Use)

ASH will review your disclosures and summarize here interests that are judged to be current, material, and with an affected company. You will then be invited to review our determinations and to agree to make all parts of this form (A, B and C) publically available.

|                            |                                                                            |
|----------------------------|----------------------------------------------------------------------------|
| Name of guideline panel(s) | Guideline Panel on Prevention and Treatment of VTE in Patients with Cancer |
|----------------------------|----------------------------------------------------------------------------|

| <i>Approved to participate?</i> | <i>Status</i>       | <i>Recusal may be required?</i> | <i>Reviewer Name and Date</i>                  | <i>Notes</i>                                                                                         |
|---------------------------------|---------------------|---------------------------------|------------------------------------------------|------------------------------------------------------------------------------------------------------|
| Yes                             | Conflicted minority | Yes                             | 5/1/2015;<br>5/5/2015                          | Dr. Khorana expects new interests that may be conflicting (see his response to Part B, question 10). |
| Yes                             | Conflicted minority | Yes                             | 2/16/2017<br>Alexander;<br>2/21/2017<br>Kunkle | New disclosures. See Part D.                                                                         |
| Yes                             | Conflicted minority | Yes                             | 2/12/2018<br>Alexander                         | New disclosures. See Part D.                                                                         |
| Yes                             | Conflicted minority |                                 | 7/7/2020<br>Alexander                          | New disclosures. See Part D. On 7/1/2020, Dr. Khorana confirmed all information in this form.        |

If status is conflicted minority, summarize all current material interests in affected companies:

| <i>Company</i> | <i>Description</i>                                                                  | <i>Disclosure Date</i> | <i>ASH Notes</i>                  |
|----------------|-------------------------------------------------------------------------------------|------------------------|-----------------------------------|
| Janssen        | Personal income from consulting. Will co-chair steering committee of upcoming study | 04/16/2015             | Janssen markets rivaroxaban.      |
| Leo Pharma     | Personal income from consulting. Member of steering committee of CATCH trial        | 04/16/2015             | Leo markets tinzaparin, a LMWH.   |
| Bayer          | Personal income from consulting                                                     | 02/16/2017             | Bayer markets rivaroxaban.        |
| Pfizer         | Direct payment for consulting.                                                      | 02/12/2018             | COI. Pfizer markets apixaban.     |
| Janssen        | Direct payment for consulting.                                                      | 02/12/2018             | COI. Janssen markets rivaroxaban. |

| <i>Company</i> | <i>Description</i>            | <i>Disclosure Date</i> | <i>ASH Notes</i>                |
|----------------|-------------------------------|------------------------|---------------------------------|
| Bayer          | Direct payment for consulting | 02/12/2018             | COI. Bayer markets rivaroxaban. |

Notes:

|  |
|--|
|  |
|--|

## Part D. New Declarations

The following interests were disclosed after appointment:

| <i>Company</i> | <i>Description</i>                                                        | <i>Disclosure Date</i> | <i>ASH Internal Notes</i>                                                                                                                                                            |
|----------------|---------------------------------------------------------------------------|------------------------|--------------------------------------------------------------------------------------------------------------------------------------------------------------------------------------|
| Bayer          | Direct payment for consulting                                             | 02/16/2017             | COI. Bayer markets rivaroxaban.                                                                                                                                                      |
| Halozyme       | Direct payment for consulting                                             | 02/16/2017             | Not an affected company. Halozyme does not market any devices or drugs used in the diagnosis or treatment of VTE.                                                                    |
| Angiodynamics  | Dr. Khorana anticipates consulting with Angiodynamics later this year.    | 02/16/2017             | Angiodynamics markets technologies for venous disease and vascular access. However, these products are not expected to be addressed by guidelines on prevention or treatment of VTE. |
| Pfizer         | Direct payment for consulting. This paid activity ended in December 2017. | 02/12/2018             | COI. Pfizer markets apixaban.                                                                                                                                                        |
| Janssen        | Direct payment for consulting.                                            | 02/12/2018             | COI. Janssen markets rivaroxaban.                                                                                                                                                    |
| Bayer          | Direct payment for consulting                                             | 02/12/2018             | COI. Bayer markets rivaroxaban.                                                                                                                                                      |
| PharmaCyte     | Direct payment for consulting                                             | 02/12/2018             | Not an affected company. Pharmacyte does not market any devices or drugs used in the diagnosis or treatment of VTE.                                                                  |
| Pharmacyclics  | Direct payments for consulting                                            |                        | Not an affected company. Pharmacyclics does not market any devices or drugs used in the                                                                                              |

| <i>Company</i>               | <i>Description</i>                                          | <i>Disclosure Date</i> | <i>ASH Internal Notes</i>                                                                                   |
|------------------------------|-------------------------------------------------------------|------------------------|-------------------------------------------------------------------------------------------------------------|
|                              |                                                             |                        | diagnosis or treatment of VTE.                                                                              |
| Bristol Myers Squibb         | Direct payment for consulting                               | 7/1/2020               | COI. BMS markets apixaban.                                                                                  |
| Seattle Genetics (2018-2019) | Direct payment for consulting.                              | 7/1/2020               | Not a COI. Seattle Genetics does not market any drugs or devices used in the diagnosis or treatment of VTE. |
| Pfizer                       | Direct payment for consulting                               | 7/1/2020               | COI. Pfizer markets apixaban                                                                                |
| Pharmacyclics                | Direct payment for consulting                               | 7/1/2020               | Not a COI. Pharmacyclics does not market any drugs or devices used in the diagnosis or treatment of VTE.    |
| Angiodymanics                | Direct payment for consulting. This activity ended in 2018. | 7/1/2020               | This is an update to a previous disclosure.                                                                 |
| Leo Pharma                   | Direct payment for consulting. This activity ended in 2018. | 7/1/2020               | This is an update to a previous disclosure.                                                                 |
| Medscape                     | Direct payment for consulting.                              | 7/1/2020               | Not a COI. Medscape does not market any drugs or devices used in the treatment or diagnosis of VTE.         |
| Merck                        | Research funding. Study of anti-cancer treatments. Site PI. | 7/1/2020               | Not a COI. Merck does not market any drugs or devices used in the treatment or diagnosis of VTE.            |
| Array                        | Research funding. Study of anti-cancer treatments. Site PI. | 7/1/2020               | Not a COI. Array Biopharma does not market any drugs or devices used in the treatment or diagnosis of VTE.  |

| <i>Company</i>       | <i>Description</i>                                          | <i>Disclosure Date</i> | <i>ASH Internal Notes</i>                                                                                                                                                                           |
|----------------------|-------------------------------------------------------------|------------------------|-----------------------------------------------------------------------------------------------------------------------------------------------------------------------------------------------------|
| Bristol Myers Squibb | Research funding. Study of anti-cancer treatments. Site PI. | 7/1/2020               | COI. BMS markets apixaban. However, Dr. Khorana does not have a leadership role, the subject of the research is unrelated to the guideline topic and all funding goes to Dr. Khorana's institution. |
| Leap                 | Research funding. Study of anti-cancer treatments. Site PI. | 7/1/2020               | Not a COI. Leap Pharmaceuticals does not market any drugs or devices used in the diagnosis or treatment of VTE.                                                                                     |



# ASH Guideline Panel Declarations of Interest Form

## Part A. Material Interests in Companies

### Equity

1. Do you currently or in the past 24 months have you had equity in any for-profit company that develops, produces, markets, or distributes drugs, devices, services, or therapies used to diagnose, treat, monitor, manage, or alleviate health conditions? Equity includes stock, stock options, and other ownership interests but excludes diversified mutual fund shares.

No

Yes, as described below:

Add rows as needed for each equity interest.

| <i>Company</i> | <i>Description</i> | <i>Date Divested</i> | <i>For ASH Internal Use</i> |
|----------------|--------------------|----------------------|-----------------------------|
|                |                    |                      |                             |
|                |                    |                      |                             |

### Patents and Royalties

2. Do you currently or in the past 24 months have you owned patents for or received royalties from any intellectual property or product used to diagnose, treat, monitor, manage, or alleviate health conditions?

No

Yes, as described below:

Add rows as needed for each patent or royalty interest.

| <i>Company</i> | <i>Description</i> | <i>Date Divested</i> | <i>For ASH Internal Use</i> |
|----------------|--------------------|----------------------|-----------------------------|
|                |                    |                      |                             |
|                |                    |                      |                             |

## Personal Income or Other Remuneration

3. Do you currently or in the past 24 months have you received personal income or other remuneration (e.g., reimbursement or financial support for the costs of travel) from any for-profit company that develops, produces, markets, or distributes drugs, devices, services, or therapies used to diagnose, treat, monitor, manage, or alleviate health conditions?

No

Yes, as described below:

Column 1 Name the company.

Column 2 Describe the activity for which you received income or other remuneration, e.g., employment, consultancy, speakers bureau involvement, service on an advisory committee or board, expert testimony.

Column 3 Indicate when the activity ended, if applicable. (If the activity has not yet ended, indicate "current" or "ongoing.")

Add rows as needed for each activity.

To report activities that generate revenues for your institution, see Part B, Question 4.

| <i>Company</i> | <i>Description</i> | <i>End Date</i>          | <i>For ASH Internal Use</i> |
|----------------|--------------------|--------------------------|-----------------------------|
| Pfizer         | Advisory Board Mtg | Oct 24, 2014 (1 day mtg) | Ended before appointment    |
|                |                    |                          |                             |
|                |                    |                          |                             |

## Industry-Funded Research

4. Do you currently or in the past 24 months have you been involved in research funded or supported (e.g., in kind support) by any for-profit company that develops, produces, markets, or distributes drugs, devices, services, or therapies used to diagnose, treat, monitor, manage, or alleviate health conditions?

No

Yes, as described below:

Column 1 Name the company funding or supporting the research.

Column 2 Briefly describe the research project. Indicate if funding or support goes to you directly or to your institution.



Column 3 Describe your role: (a) national or overall principal investigator, (b) member of a steering committee of a study that does not have a principal investigator, (c) site or local investigator. If other than these options, please describe.

Column 4 Indicate when your involvement ended, if applicable. (If your involvement has not yet ended, indicate “current” or “ongoing.”)

Add rows as needed for each research project.

| <i>Company</i> | <i>Description of Research</i>                                                          | <i>My Role</i>                                                                                                                                                                                                           | <i>End Date</i> | <i>For ASH Internal Use</i>                 |
|----------------|-----------------------------------------------------------------------------------------|--------------------------------------------------------------------------------------------------------------------------------------------------------------------------------------------------------------------------|-----------------|---------------------------------------------|
| GE Healthcare  | Hematopoietic stem cell expansion. Money goes to institution and used by me as a grant. | PI of an investigator initiated study. GE provided some of the funding. Univ. of Calif. provided the remainder. It is a grant offered through the Univ. of California Office of the President, call a UC Discovery Grant | 2014            | Not a COI: Funding ended before appointment |
|                |                                                                                         |                                                                                                                                                                                                                          |                 |                                             |
|                |                                                                                         |                                                                                                                                                                                                                          |                 |                                             |

### My Partner’s or Spouse’s Interests

5. Currently or in the past 24 months has *your partner or spouse* had any of the interests described in questions 1-4?

No

Yes, as described below:

Add rows as needed for each interest.

| <i>Company</i> | <i>Description</i> | <i>End Date</i> | <i>For ASH Internal Use</i> |
|----------------|--------------------|-----------------|-----------------------------|
|                |                    |                 |                             |
|                |                    |                 |                             |
|                |                    |                 |                             |

## Part B. Interests That Are Not Mainly Financial

You have been invited by ASH to participate in the development of clinical practice guidelines on the following topic(s):

Prevention and Treatment of VTE in Patients with Cancer

The questions that follow are designed to elicit information about personal beliefs, intellectual positions or opinions, institutional relationships, and other interests that are not mainly financial and that may be relevant to guidelines on the above topic(s).

### Personal Beliefs

1. Do you have strongly held beliefs related to the topic of these guidelines?

No

Yes

If yes, please explain: I strongly believe that an excellent set of guidelines, derived from the current cumulative evidence in the literature, will be a very useful publication for clinicians and for patients.

### Previously Published Opinions

2. Have you ever authored, coauthored, or publicly provided an opinion related to the topic of these guidelines, e.g., a clinical practice guideline, textbook, review article, meeting poster or presentation, grand rounds talk, letter to the editor?

No

Yes

If yes, what were those views and where were they made?

### Research

3. Currently or in the past 24 months, have you been involved in a leadership role in any research project not already reported under Part A, Question 4, relevant to the topic of these guidelines, e.g., a research project funded by a nonprofit or governmental organization?

No

Yes, as described below:

Column 1 Name the entity funding the research.

Column 2 Describe the research project.

Column 3 Describe your role: (a) national or overall principal investigator, (b) member of a steering committee of a study that does not have a principal investigator, (c) site or local investigator. If other than these options, please describe.

Column 4 Indicate when your involvement ended, if applicable. (If your involvement has not yet ended, indicate "current" or "ongoing.")

Add rows as needed for each research project.

| <i>Funder</i> | <i>Description of Research</i> | <i>My Role</i> | <i>End Date</i> |
|---------------|--------------------------------|----------------|-----------------|
|               |                                |                |                 |
|               |                                |                |                 |
|               |                                |                |                 |

## Institutional Relationships

4. Do you generate revenues or nonfinancial benefits for your institution by teaching, speaking, consulting, testifying, writing, or otherwise sharing your knowledge or opinions about this guideline topic?

Don't know

No

Yes

If yes, please explain:

5. Could your institution benefit or be harmed by recommendations of guidelines on this topic?

Don't know

No

Yes

If yes, please explain:

## Career Advancement

6. How would you characterize the support you would receive from your primary mentor, institution, or other entities if your work on this panel or authorship of these guidelines generated a strong reaction from peers outside your institution?

UCSF is firmly dedicated to academic pursuits and the development of educational materials regardless of popular response. The institution does not shy away from controversy, nor does it seek controversy.

## Advocacy and Policy Positions

7. Do you work for or are you a member of an organization with a stated position related to the topic of these guidelines, e.g., position statement, editorial, blog, amicus brief, or legislature or legal testimony?

No

Yes

If yes, are you involved in formulating or voting for positions?

No

Yes

If yes, could recommendations of these guidelines conflict with policies you have promoted or are obligated to follow?

Don't know or not applicable

No

Yes

If yes, please explain:

## Professional Specialty

8. What is your primary clinical specialty or subspecialty?

Internal Medicine & Hematology

9. Do you prescribe or otherwise recommend diagnostic tests or treatments that may be addressed by these guidelines?

No

Yes

If yes, please explain: I take care of patients with venous thromboembolism, and some of them have cancer. Some of those patients I send for imaging to make the diagnosis, and for some/all I order lab tests that help in diagnosis/management.

## Expected Interests

10. Do you expect new financial or nonfinancial interests relevant to the topic of these guidelines not already declared in Part A or Part B of this form?

No

Yes

If yes, please describe:

## Part C. Summary (ASH Internal Use)

ASH will review your disclosures and summarize here interests that are judged to be current, material, and with an affected company. You will then be invited to review our determinations and to agree to make all parts of this form (A, B and C) publically available.

|                            |                                                                            |
|----------------------------|----------------------------------------------------------------------------|
| Name of guideline panel(s) | Guideline Panel on Prevention and Treatment of VTE in Patients with Cancer |
|----------------------------|----------------------------------------------------------------------------|

| <i>Approved to participate?</i> | <i>Status</i>         | <i>Recusal may be required?</i> | <i>Reviewer Name and Date</i> | <i>Notes</i>                                                     |
|---------------------------------|-----------------------|---------------------------------|-------------------------------|------------------------------------------------------------------|
| Yes                             | Unconflicted majority | No                              | 5/1/2015; 5/9/15              |                                                                  |
| Yes                             | Unconflicted majority | No                              | 8/13/2015; 8/16/15            | Disclosed new research funding from OPKO Health. See Part D.     |
| Yes                             |                       |                                 | 7/15/2020 Alexander           | On 7/7/2020, Dr. Leavitt confirmed all information in this form. |
|                                 |                       |                                 |                               |                                                                  |

If status is conflicted minority, summarize all current material interests in affected companies:

| <i>Company</i>      | <i>Description</i> | <i>Disclosure Date</i> | <i>ASH Notes</i>                              |
|---------------------|--------------------|------------------------|-----------------------------------------------|
| Johnson and Johnson | Stock ownership.   | 7/7/2020               | COI. Johnson and Johnson markets rivaroxaban. |
|                     |                    |                        |                                               |
|                     |                    |                        |                                               |
|                     |                    |                        |                                               |

Notes:

|  |
|--|
|  |
|--|

## Part D. New Interests

The following interests were disclosed after appointment:

| <i>Company</i>          | <i>Description</i>                                                                                                                                                                                  | <i>Disclosure Date</i> | <i>ASH Internal Notes</i>                                                                                               |
|-------------------------|-----------------------------------------------------------------------------------------------------------------------------------------------------------------------------------------------------|------------------------|-------------------------------------------------------------------------------------------------------------------------|
| OPKO Health Inc.        | Site PI for phase I study for a long-acting Factor 7 product. Study will look at toxicity, with patients receiving a single injection (dose escalation) and safety and pharmacology data collected. | 7/28/2015              | Not a COI: Dr. Leavitt does not have a leadership role (site PI), and all payments will go directly to his institution. |
| Johnson and Johnson     | Stock ownership.                                                                                                                                                                                    | 7/7/2020               | <b>COI.</b> Johnson and Johnson markets rivaroxaban. This disclosure was made after the recommendations were formed.    |
| BioMarin                | Direct payment for participation on an advisory board regarding hemophilia A gene therapy. Sep & Oct 2019                                                                                           | 7/7/2020               | Not a COI. BioMarin does not market any drugs used in the treatment of VTE.                                             |
| Dova Pharmaceuticals    | Direct payment for participation on an advisory board regarding ITP. Feb 2020.                                                                                                                      | 7/7/2020               | Not a COI. Dova Pharmaceuticals does not market any drugs used in the treatment of VTE.                                 |
| Bio Products Laboratory | Direct payment for participation on an advisory board regarding Factor XI deficiency                                                                                                                | 7/7/2020               | Not a COI. BPL does not market any drugs use in the treatment of VTE.                                                   |
| BioMarin                | Research funding for clinical trial on hemophilia A gene therapy. Dr. Leavitt is the PI.                                                                                                            | 7/7/2020               | Not a COI. BioMarin does not market any drugs used in the treatment of VTE.                                             |



| <i>Company</i>       | <i>Description</i>                                                                                        | <i>Disclosure Date</i> | <i>ASH Internal Notes</i>                                                                                                                                                                   |
|----------------------|-----------------------------------------------------------------------------------------------------------|------------------------|---------------------------------------------------------------------------------------------------------------------------------------------------------------------------------------------|
| Sangamo Therapeutics | Research funding for clinical trial on hemophilia A gene therapy. Dr. Leavitt is the PI.                  | 7/7/2020               | Not a COI. Sangamo Therapeutics does not market any drugs used in the treatment of VTE.                                                                                                     |
| Pfizer               | Research funding for clinical trial on hemophilia A and hemophilia B gene therapy. Dr. Leavitt is the PI. | 7/7/2020               | Not a COI. Pfizer markets apixaban and Dr. Leavitt has a leadership role. However, the subject of the research is unrelated to the guideline topic and all funding goes to his institution. |
| Kezar Life Sciences  | Research funding for a study on ITP and AIHA. Dr. Leavitt is the PI.                                      | 7/7/2020               | Not a COI. Kezar Life Sciences does not market any drugs used in the treatment of VTE.                                                                                                      |



# ASH Guideline Panel Declarations of Interest Form

## Part A. Material Interests in Companies

### Equity

1. Do you currently or in the past 24 months have you had equity in any for-profit company that develops, produces, markets, or distributes drugs, devices, services, or therapies used to diagnose, treat, monitor, manage, or alleviate health conditions? Equity includes stock, stock options, and other ownership interests but excludes diversified mutual fund shares.

No

Yes, as described below:

Add rows as needed for each equity interest.

| <i>Company</i> | <i>Description</i> | <i>Date Divested</i> | <i>For ASH Internal Use</i> |
|----------------|--------------------|----------------------|-----------------------------|
|                |                    |                      |                             |
|                |                    |                      |                             |

### Patents and Royalties

2. Do you currently or in the past 24 months have you owned patents for or received royalties from any intellectual property or product used to diagnose, treat, monitor, manage, or alleviate health conditions?

No

Yes, as described below:

Add rows as needed for each patent or royalty interest.

| <i>Company</i> | <i>Description</i> | <i>Date Divested</i> | <i>For ASH Internal Use</i> |
|----------------|--------------------|----------------------|-----------------------------|
|                |                    |                      |                             |
|                |                    |                      |                             |

## Personal Income or Other Remuneration

3. Do you currently or in the past 24 months have you received personal income or other remuneration (e.g., reimbursement or financial support for the costs of travel) from any for-profit company that develops, produces, markets, or distributes drugs, devices, services, or therapies used to diagnose, treat, monitor, manage, or alleviate health conditions?

No

Yes, as described below:

Column 1 Name the company.

Column 2 Describe the activity for which you received income or other remuneration, e.g., employment, consultancy, speakers bureau involvement, service on an advisory committee or board, expert testimony.

Column 3 Indicate when the activity ended, if applicable. (If the activity has not yet ended, indicate “current” or “ongoing.”)

Add rows as needed for each activity.

To report activities that generate revenues for your institution, see Part B, Question 4.

| <i>Company</i>       | <i>Description</i>                                                          | <i>End Date</i> | <i>For ASH Internal Use</i>                  |
|----------------------|-----------------------------------------------------------------------------|-----------------|----------------------------------------------|
| Avivia               | Lecture to HCP on topic                                                     | May 2014        | Ended before appointment                     |
| Bayer                | Advisory board meeting                                                      | April 2015      | Ended before appointment                     |
| Bristol-Myers Squibb | Advisory board meeting                                                      | October 2014    | Ended before appointment                     |
| Boehringer Ingelheim | Lecture to HCP on Topic                                                     | May 2013        | Ended before appointment                     |
| Daiichi Sankyo       | Advisory Board                                                              | March 2014      | Ended before appointment                     |
| Leo Pharma           | Advisory board meeting and Principal investigator of a trial (now complete) | June 2015       | COI: Leo markets tinzaparin, a LMWH.         |
| Pfizer               | Consultancy<br>Advisory Board Member                                        | May 2015        | COI: Pfizer markets apixaban and dalteparin. |

| <i>Company</i> | <i>Description</i>      | <i>End Date</i> | <i>For ASH Internal Use</i> |
|----------------|-------------------------|-----------------|-----------------------------|
| Sanofi Aventis | Lecture to HCP on topic | February 2014   | Ended before appointment    |

### Industry-Funded Research

4. Do you currently or in the past 24 months have you been involved in research funded or supported (e.g., in kind support) by any for-profit company that develops, produces, markets, or distributes drugs, devices, services, or therapies used to diagnose, treat, monitor, manage, or alleviate health conditions?

No

Yes, as described below:

**Column 1** Name the company funding or supporting the research.

**Column 2** Briefly describe the research project. Indicate if funding or support goes to you directly or to your institution.

**Column 3** Describe your role: (a) national or overall principal investigator, (b) member of a steering committee of a study that does not have a principal investigator, (c) site or local investigator. If other than these options, please describe.

**Column 4** Indicate when your involvement ended, if applicable. (If your involvement has not yet ended, indicate “current” or “ongoing.”)

Add rows as needed for each research project.

| <i>Company</i>      | <i>Description of Research</i>                                                         | <i>My Role</i>                           | <i>End Date</i> | <i>For ASH Internal Use</i>                                                                                                          |
|---------------------|----------------------------------------------------------------------------------------|------------------------------------------|-----------------|--------------------------------------------------------------------------------------------------------------------------------------|
| Bristol-Myer Squibb | Peer-reviewed (CIHR) funded RCT with study drug provided by BMS (apixaban and placebo) | Co-applicant in grant, site investigator | 2017            | BMS (with Pfizer) markets apixaban. However, funding is provided by CIHR, and Dr. Lee does not have a leadership role in this study. |
|                     |                                                                                        |                                          |                 |                                                                                                                                      |
|                     |                                                                                        |                                          |                 |                                                                                                                                      |
|                     |                                                                                        |                                          |                 |                                                                                                                                      |
|                     |                                                                                        |                                          |                 |                                                                                                                                      |

## My Partner's or Spouse's Interests

5. Currently or in the past 24 months has *your partner or spouse* had any of the interests described in questions 1-4?

No

Yes, as described below:

Add rows as needed for each interest.

| <i>Company</i> | <i>Description</i> | <i>End Date</i> | <i>For ASH Internal Use</i> |
|----------------|--------------------|-----------------|-----------------------------|
|                |                    |                 |                             |
|                |                    |                 |                             |
|                |                    |                 |                             |

# Part B. Interests That Are Not Mainly Financial

You have been invited by ASH to participate in the development of clinical practice guidelines on the following topic(s):

Prevention and Treatment of VTE in Patients with Cancer

The questions that follow are designed to elicit information about personal beliefs, intellectual positions or opinions, institutional relationships, and other interests that are not mainly financial and that may be relevant to guidelines on the above topic(s).

## Personal Beliefs

1. Do you have strongly held beliefs related to the topic of these guidelines?

No

Yes

If yes, please explain:

It is an important and common clinical topic for general hematologists and other physicians providing care to patients with cancer-associated thrombosis. More research in this population is needed.

## Previously Published Opinions

2. Have you ever authored, coauthored, or publicly provided an opinion related to the topic of these guidelines, e.g., a clinical practice guideline, textbook, review article, meeting poster or presentation, grand rounds talk, letter to the editor?

No

Yes

If yes, what were those views and where were they made?

I am a co-author of the ASCO guidelines and ISTH subcommittee guidance documents on the topic. I have written many review articles, including chapters for Hematology (ASH), book chapters and original articles on the topic. I have made many presentations on the topic at educational rounds,

local meetings, national and international conferences. Cancer-associated thrombosis is my area of research interest and expertise.

## Research

3. Currently or in the past 24 months, have you been involved in a leadership role in any research project not already reported under Part A, Question 4, relevant to the topic of these guidelines, e.g., a research project funded by a nonprofit or governmental organization?

No

Yes, as described below:

Column 1 Name the entity funding the research.

Column 2 Describe the research project.

Column 3 Describe your role: (a) national or overall principal investigator, (b) member of a steering committee of a study that does not have a principal investigator, (c) site or local investigator. If other than these options, please describe.

Column 4 Indicate when your involvement ended, if applicable. (If your involvement has not yet ended, indicate "current" or "ongoing.")

Add rows as needed for each research project.

| <i>Funder</i> | <i>Description of Research</i> | <i>My Role</i> | <i>End Date</i> |
|---------------|--------------------------------|----------------|-----------------|
|               |                                |                |                 |
|               |                                |                |                 |
|               |                                |                |                 |

## Institutional Relationships

4. Do you generate revenues or nonfinancial benefits for your institution by teaching, speaking, consulting, testifying, writing, or otherwise sharing your knowledge or opinions about this guideline topic?

Don't know

No

Yes

If yes, please explain:

5. Could your institution benefit or be harmed by recommendations of guidelines on this topic?

Don't know

No

Yes

If yes, please explain:

## Career Advancement

6. How would you characterize the support you would receive from your primary mentor, institution, or other entities if your work on this panel or authorship of these guidelines generated a strong reaction from peers outside your institution?

I do not anticipate any change in support from my institution, mentor or other entities from working on this panel or authorship of these guidelines.

## Advocacy and Policy Positions

7. Do you work for or are you a member of an organization with a stated position related to the topic of these guidelines, e.g., position statement, editorial, blog, amicus brief, or legislature or legal testimony?

No

Yes

If yes, are you involved in formulating or voting for positions?

No

Yes

If yes, could recommendations of these guidelines conflict with policies you have promoted or are obligated to follow?

Don't know or not applicable

No

Yes

If yes, please explain:

## Professional Specialty

8. What is your primary clinical specialty or subspecialty?

Hematology, specializing in thrombosis



9. Do you prescribe or otherwise recommend diagnostic tests or treatments that may be addressed by these guidelines?

No

Yes

If yes, please explain:

I see patients with cancer-associated thrombosis on a regular basis in my clinical practice.

### Expected Interests

10. Do you expect new financial or nonfinancial interests relevant to the topic of these guidelines not already declared in Part A or Part B of this form?

No

Yes

If yes, please describe:

## Part C. Summary (ASH Internal Use)

ASH will review your disclosures and summarize here interests that are judged to be current, material, and with an affected company. You will then be invited to review our determinations and to agree to make all parts of this form (A, B and C) publically available.

|                            |                                                                            |
|----------------------------|----------------------------------------------------------------------------|
| Name of guideline panel(s) | Guideline Panel on Prevention and Treatment of VTE in Patients with Cancer |
|----------------------------|----------------------------------------------------------------------------|

| <i>Approved to participate?</i> | <i>Status</i>       | <i>Recusal may be required?</i> | <i>Reviewer Name and Date</i> | <i>Notes</i>                                                                                                                                          |
|---------------------------------|---------------------|---------------------------------|-------------------------------|-------------------------------------------------------------------------------------------------------------------------------------------------------|
| Yes                             | Conflicted minority | Yes                             | 5/1/2015;<br>5/5/2015         |                                                                                                                                                       |
| Yes                             | Conflicted minority | Yes                             | 6/23/15                       | New potential COI added (BMS/Pfizer).                                                                                                                 |
| Yes                             | Conflicted minority | Yes                             | 10/8/15;<br>10/15/15          | New disclosures added to Part D: BMS research (previously described as a potential COI) and Bayer steering committee. The BMS research is a conflict. |
| Yes                             | Conflicted minority |                                 | 5/28/2020<br>Alexander        | On 5/26/2020, Dr. Lee confirmed all information in this form.                                                                                         |

If status is conflicted minority, summarize all current material interests in affected companies:

| <i>Company</i> | <i>Description</i>                                                                               | <i>Disclosure Date</i> | <i>ASH Notes</i>                        |
|----------------|--------------------------------------------------------------------------------------------------|------------------------|-----------------------------------------|
| Leo Pharma     | Personal income from advisory board meeting and principal investigator of a trial (now complete) | 4/27/15                | Leo markets tinzaparin, a LMWH.         |
| Pfizer         | Personal income from consulting and service on an advisory board                                 | 4/27/15                | Pfizer markets apixaban and dalteparin. |
| BMS            | Leadership role for a study of apixaban supported by BMS                                         | 9/17/15                | BMS markets apixaban.                   |
|                |                                                                                                  |                        |                                         |
|                |                                                                                                  |                        |                                         |

| <i>Company</i> | <i>Description</i> | <i>Disclosure Date</i> | <i>ASH Notes</i> |
|----------------|--------------------|------------------------|------------------|
|                |                    |                        |                  |

Notes:

|  |
|--|
|  |
|--|

## Part D. New Interests

The following interests were disclosed after appointment:

| <i>Company</i> | <i>Description</i>                                                                                                                                                                                                                                                                                                                                                                           | <i>Disclosure Date</i> | <i>ASH Internal Notes</i>                                                                                                                                                    |
|----------------|----------------------------------------------------------------------------------------------------------------------------------------------------------------------------------------------------------------------------------------------------------------------------------------------------------------------------------------------------------------------------------------------|------------------------|------------------------------------------------------------------------------------------------------------------------------------------------------------------------------|
| Daiichi Sankyo | My centre will be participating in an international, investigator-initiated clinical trial using the study drug (edoxaban) supplied by Daiichi Sankyo later this year. I am the site PI and the study is expected to run for 2 years. I will not be receiving any funds personally. All funds will be directed to our hospitals' research institute to cover overhead and operational costs. | 6/18/2015              | Not a COI: Although Daiichi Sankyo is an affected company, markets edoxaban, Dr. Lee does not have a leadership role, she is Site PI. Also, all funds go to her institution. |
| BMS-Pfizer     | I have applied to BMS-Pfizer to provide study drug apixaban and perform drug levels for a study that I designed. It is a single centre study with 24 patients. I have not received confirmation from BMS-Pfizer that it will support the study.                                                                                                                                              | 6/18/2015              | Potential COI: BMS-Pfizer markets apixaban. Dr. Lee would have a leadership role if funding is approved.<br><br>*See update below*                                           |
| BMS            | Investigator-initiated study will be supported by BMS, which will provide study drug and a grant of ~\$24,000 CDN to perform assays. The study is also supported by a peer-reviewed grant                                                                                                                                                                                                    | 9/17/15                | COI: Although funding for this research goes to Dr. Lee's institution, BMS is an affected company (markets apixaban), and Dr. Lee has a leadership role.                     |

| <i>Company</i> | <i>Description</i>                                                                                                                                                                                                                                           | <i>Disclosure Date</i> | <i>ASH Internal Notes</i>                                                          |
|----------------|--------------------------------------------------------------------------------------------------------------------------------------------------------------------------------------------------------------------------------------------------------------|------------------------|------------------------------------------------------------------------------------|
|                | <p>from the Canadian Hematology Society. I will not personally receive any funding for the study. In fact, I will be subsidizing the cost of the study with my own internal funds to pay for personnel and infrastructure.</p>                               |                        |                                                                                    |
| <p>Bayer</p>   | <p>Steering Committee of an industry-funded international registry looking at the use of anticoagulation in cancer patients. The work will be mainly done through teleconferencing so I will not be receiving an honorarium or need expenses reimbursed.</p> | <p>9/17/15</p>         | <p>Not a COI: Dr. Lee will not receive any remuneration for her participation.</p> |



# ASH Guideline Panel Declarations of Interest Form

## Part A. Material Interests in Companies

### Equity

1. Do you currently or in the past 24 months have you had equity in any for-profit company that develops, produces, markets, or distributes drugs, devices, services, or therapies used to diagnose, treat, monitor, manage, or alleviate health conditions? Equity includes stock, stock options, and other ownership interests but excludes diversified mutual fund shares.

No

Yes, as described below:

Add rows as needed for each equity interest.

| <i>Company</i> | <i>Description</i> | <i>Date Divested</i> | <i>For ASH Internal Use</i> |
|----------------|--------------------|----------------------|-----------------------------|
|                |                    |                      |                             |
|                |                    |                      |                             |

### Patents and Royalties

2. Do you currently or in the past 24 months have you owned patents for or received royalties from any intellectual property or product used to diagnose, treat, monitor, manage, or alleviate health conditions?

No

Yes, as described below:

Add rows as needed for each patent or royalty interest.

| <i>Company</i> | <i>Description</i> | <i>Date Divested</i> | <i>For ASH Internal Use</i> |
|----------------|--------------------|----------------------|-----------------------------|
|                |                    |                      |                             |
|                |                    |                      |                             |

### Personal Income or Other Remuneration

3. Do you currently or in the past 24 months have you received personal income or other remuneration (e.g., reimbursement or financial support for the costs of travel) from any for-profit company that develops, produces, markets, or distributes drugs, devices, services, or therapies used to diagnose, treat, monitor, manage, or alleviate health conditions?

No

Yes, as described below:

Column 1 Name the company.

Column 2 Describe the activity for which you received income or other remuneration, e.g., employment, consultancy, speakers bureau involvement, service on an advisory committee or board, expert testimony.

Column 3 Indicate when the activity ended, if applicable. (If the activity has not yet ended, indicate “current” or “ongoing.”)

Add rows as needed for each activity.

To report activities that generate revenues for your institution, see Part B, Question 4.

| <i>Company</i> | <i>Description</i> | <i>End Date</i> | <i>For ASH Internal Use</i> |
|----------------|--------------------|-----------------|-----------------------------|
|                |                    |                 |                             |
|                |                    |                 |                             |
|                |                    |                 |                             |

### Industry-Funded Research

4. Do you currently or in the past 24 months have you been involved in research funded or supported (e.g., in kind support) by any for-profit company that develops, produces, markets, or distributes drugs, devices, services, or therapies used to diagnose, treat, monitor, manage, or alleviate health conditions?

No

Yes, as described below:

Column 1 Name the company funding or supporting the research.

Column 2 Briefly describe the research project. Indicate if funding or support goes to you directly or to your institution.

Column 3 Describe your role: (a) national or overall principal investigator, (b) member of a steering committee of a study that does not have a principal investigator, (c) site or local investigator. If other than these options, please describe.

Column 4 Indicate when your involvement ended, if applicable. (If your involvement has not yet ended, indicate “current” or “ongoing.”)

Add rows as needed for each research project.

| <i>Company</i> | <i>Description of Research</i>     | <i>My Role</i> | <i>End Date</i> | <i>For ASH Internal Use</i>                                                                                                                             |
|----------------|------------------------------------|----------------|-----------------|---------------------------------------------------------------------------------------------------------------------------------------------------------|
| Amgen          | PI on research grant to Fred Hutch | PI             | 12/31/2016      | Not a COI: Amgen markets drugs for cancer but not for VTE. These guidelines are not expected to make recommendations about choice of cancer treatments. |
|                |                                    |                |                 |                                                                                                                                                         |

### My Partner’s or Spouse’s Interests

5. Currently or in the past 24 months has *your partner or spouse* had any of the interests described in questions 1-4?

No

Yes, as described below:

Add rows as needed for each interest.

| <i>Company</i> | <i>Description</i> | <i>End Date</i> | <i>For ASH Internal Use</i> |
|----------------|--------------------|-----------------|-----------------------------|
|                |                    |                 |                             |
|                |                    |                 |                             |



## Part B. Interests That Are Not Mainly Financial

You have been invited by ASH to participate in the development of clinical practice guidelines on the following topic(s):

Prevention and Treatment of VTE in Patients with Cancer

The questions that follow are designed to elicit information about personal beliefs, intellectual positions or opinions, institutional relationships, and other interests that are not mainly financial and that may be relevant to guidelines on the above topic(s).

### Personal Beliefs

1. Do you have strongly held beliefs related to the topic of these guidelines?

No

Yes

If yes, please explain:

### Previously Published Opinions

2. Have you ever authored, coauthored, or publicly provided an opinion related to the topic of these guidelines, e.g., a clinical practice guideline, textbook, review article, meeting poster or presentation, grand rounds talk, letter to the editor?

No

Yes

If yes, what were those views and where were they made?

Guidelines from the American Society of Clinical Oncology

### Research

3. Currently or in the past 24 months, have you been involved in a leadership role in any research project not already reported under Part A, Question 4, relevant to the topic of these guidelines, e.g., a research project funded by a nonprofit or governmental organization?

No

Yes, as described below:

Column 1 Name the entity funding the research.

Column 2 Describe the research project.

Column 3 Describe your role: (a) national or overall principal investigator, (b) member of a steering committee of a study that does not have a principal investigator, (c) site or local investigator. If other than these options, please describe.

Column 4 Indicate when your involvement ended, if applicable. (If your involvement has not yet ended, indicate “current” or “ongoing.”)

Add rows as needed for each research project.

| <i>Funder</i> | <i>Description of Research</i> | <i>My Role</i> | <i>End Date</i> |
|---------------|--------------------------------|----------------|-----------------|
|               |                                |                |                 |
|               |                                |                |                 |
|               |                                |                |                 |
|               |                                |                |                 |

## Institutional Relationships

4. Do you generate revenues or nonfinancial benefits for your institution by teaching, speaking, consulting, testifying, writing, or otherwise sharing your knowledge or opinions about this guideline topic?

Don't know

No

Yes

If yes, please explain:

5. Could your institution benefit or be harmed by recommendations of guidelines on this topic?

Don't know

No

Yes

If yes, please explain:

## Career Advancement

6. How would you characterize the support you would receive from your primary mentor, institution, or other entities if your work on this panel or authorship of these guidelines generated a strong reaction from peers outside your institution?

None

## Advocacy and Policy Positions

7. Do you work for or are you a member of an organization with a stated position related to the topic of these guidelines, e.g., position statement, editorial, blog, amicus brief, or legislature or legal testimony?

No

Yes

If yes, are you involved in formulating or voting for positions?

No

Yes

If yes, could recommendations of these guidelines conflict with policies you have promoted or are obligated to follow?

Don't know or not applicable

No

Yes

If yes, please explain:

## Professional Specialty

8. What is your primary clinical specialty or subspecialty?

Hematology and Oncology

9. Do you prescribe or otherwise recommend diagnostic tests or treatments that may be addressed by these guidelines?

No

Yes

If yes, please explain: I will prescribe anticoagulation to patients with VTE

## Expected Interests

10. Do you expect new financial or nonfinancial interests relevant to the topic of these guidelines not already declared in Part A or Part B of this form?

No

Yes

If yes, please describe:

## Part C. Summary (ASH Internal Use)

ASH will review your disclosures and summarize here interests that are judged to be current, material, and with an affected company. You will then be invited to review our determinations and to agree to make all parts of this form (A, B and C) publicly available.

|                            |                                                                            |
|----------------------------|----------------------------------------------------------------------------|
| Name of guideline panel(s) | Guideline Panel on Prevention and Treatment of VTE in Patients with Cancer |
|----------------------------|----------------------------------------------------------------------------|

| <i>Approved to participate?</i> | <i>Status</i>         | <i>Recusal may be required?</i> | <i>Reviewer name and date</i>                                                              | <i>Notes</i>                                                                                                                                                                                                                                                                                                                                                                                                                                                                                                                                                                 |
|---------------------------------|-----------------------|---------------------------------|--------------------------------------------------------------------------------------------|------------------------------------------------------------------------------------------------------------------------------------------------------------------------------------------------------------------------------------------------------------------------------------------------------------------------------------------------------------------------------------------------------------------------------------------------------------------------------------------------------------------------------------------------------------------------------|
| Yes                             | Unconflicted majority | No                              | 5/1/2015;<br>5/9/2015                                                                      |                                                                                                                                                                                                                                                                                                                                                                                                                                                                                                                                                                              |
| Yes                             | Unconflicted majority | No                              | 2/16/2017<br>Alexander;<br>2/21/2017<br>Kunkle                                             | New interests disclosed. See Part D.                                                                                                                                                                                                                                                                                                                                                                                                                                                                                                                                         |
| Yes                             | Has some conflicts    | N/A                             | 8/28/2019<br>Alexander;<br>9/11/2019<br>Cuker, Kunkle,<br>Pai,<br>Panepinto,<br>Rajasekhar | <p>In March 2017, Dr. Lyman reported new direct payments and research funding from companies that are not affected by the guidelines. See Part D.</p> <p>In August 2019, Dr. Lyman reported other activities, including by his spouse. Some of these activities are considered direct financial conflicts. See below and Part D.</p> <p>The guideline panel has already agreed on recommendations, and a manuscript report of the guidelines is drafted. The direct financial conflicts summarized below will be managed through disclosure in the published guidelines.</p> |

If status is conflicted minority, summarize all current material interests in affected companies:

| <i>Company</i> | <i>Description</i>                                                        | <i>Disclosure Date</i> | <i>ASH Notes</i>                       |
|----------------|---------------------------------------------------------------------------|------------------------|----------------------------------------|
| Pfizer         | Travel reimbursement for consulting. Jan 2018.                            | 8/25/2019              | COI. Pfizer markets LMWH and apixaban. |
| Pfizer         | Direct payment to spouse for consulting in December 2017                  | 8/28/2019              | COI. Pfizer markets LMWH and apixaban. |
| Bayer AG       | Direct transfer of value (travel reimbursement) to spouse in October 2018 | 8/28/2019              | COI. Bayer markets rivaroxaban.        |
|                |                                                                           |                        |                                        |

Notes:

## Part D. New Declarations

The following interests were disclosed after appointment:

| <i>Company</i>      | <i>Description</i>                                                                | <i>Disclosure Date</i> | <i>ASH Internal Notes</i> |
|---------------------|-----------------------------------------------------------------------------------|------------------------|---------------------------|
| G1 Therapeutics     | Direct payments for consulting around a new myeloid growth factor for neutropenia | 2/13/17                | Not an affected company.  |
| Halozyme            | Direct payments for consulting around the treatment of pancreatic cancer          | 2/13/17                | Not an affected company.  |
| Agendia             | Research funding                                                                  | 3/15/2017              | Not an affected company.  |
| Amgen               | Research funding – PI on research grant to Duke University                        | 3/15/2017              | Not an affected company.  |
| Amgen               | Research funding – PI on research grant to Fred Hutchinson Cancer Research Center | 3/15/2017              | Not an affected company.  |
| Amgen               | Research funding                                                                  | 3/15/2017              | Not an affected company.  |
| Celldex             | Direct payment to spouse for consulting in June 2018.                             | 3/15/2017              | Not an affected company.  |
| Genomic Health      | Direct payment for consulting                                                     | 3/15/2017              | Not an affected company.  |
| Helsinn             | Direct payment for consulting                                                     | 3/15/2017              | Not an affected company.  |
| Invitae             | Direct payment for consulting                                                     | 3/15/2017              | Not an affected company.  |
| Mylan               | Direct payment for consulting                                                     | 3/15/2017              | Not an affected company.  |
| Partners Healthcare | Direct payment for consulting                                                     | 3/15/2017              | Not an affected company.  |
| Spectrum            | Direct payment for consulting                                                     | 3/15/2017              | Not an affected company.  |

| <i>Company</i>           | <i>Description</i>                                                        | <i>Disclosure Date</i> | <i>ASH Internal Notes</i>              |
|--------------------------|---------------------------------------------------------------------------|------------------------|----------------------------------------|
| Pfizer                   | Travel reimbursement for consulting. Jan 2018.                            | 8/25/2019              | COI. Pfizer markets LMWH and apixaban. |
| Pfizer                   | Direct payment to spouse for consulting in December 2017                  | 8/28/2019              | COI. Pfizer markets LMWH and apixaban. |
| Bayer AG                 | Direct transfer of value (travel reimbursement) to spouse in October 2018 | 8/28/2019              | COI. Bayer markets rivaroxaban.        |
| Agendia                  | Direct payment to spouse for consulting in December 2018                  | 8/28/2019              | Not an affected company                |
| Mylan                    | Direct payment to spouse for consulting in February 2018                  | 8/28/2019              | Not an affected company.               |
| Beyond Springs           | Participation by spouse in consulting. No payment received.               | 8/28/2019              | Not an affected company.               |
| Spectrum Pharmaceuticals | Direct payment to spouse for consulting in February 2019                  | 8/28/2019              | Not an affected company.               |
| Amgen                    | Participation by spouse in consulting. No payment received.               | 8/28/2019              | Not an affected company.               |





# ASH Guideline Panel Declarations of Interest Form

## Part A. Material Interests in Companies

### Equity

1. Do you currently or in the past 24 months have you had equity in any for-profit company that develops, produces, markets, or distributes drugs, devices, services, or therapies used to diagnose, treat, monitor, manage, or alleviate health conditions? Equity includes stock, stock options, and other ownership interests but excludes diversified mutual fund shares.

No

Yes, as described below:

Add rows as needed for each equity interest.

| <i>Company</i> | <i>Description</i> | <i>Date Divested</i> | <i>For ASH Internal Use</i> |
|----------------|--------------------|----------------------|-----------------------------|
|                |                    |                      |                             |
|                |                    |                      |                             |

### Patents and Royalties

2. Do you currently or in the past 24 months have you owned patents for or received royalties from any intellectual property or product used to diagnose, treat, monitor, manage, or alleviate health conditions?

No

Yes, as described below:

Add rows as needed for each patent or royalty interest.

| <i>Company</i> | <i>Description</i> | <i>Date Divested</i> | <i>For ASH Internal Use</i> |
|----------------|--------------------|----------------------|-----------------------------|
|                |                    |                      |                             |
|                |                    |                      |                             |

### Personal Income or Other Remuneration

3. Do you currently or in the past 24 months have you received personal income or other remuneration (e.g., reimbursement or financial support for the costs of travel) from any for-profit company that develops, produces, markets, or distributes drugs, devices, services, or therapies used to diagnose, treat, monitor, manage, or alleviate health conditions?

No

Yes, as described below:

Column 1 Name the company.

Column 2 Describe the activity for which you received income or other remuneration, e.g., employment, consultancy, speakers bureau involvement, service on an advisory committee or board, expert testimony.

Column 3 Indicate when the activity ended, if applicable. (If the activity has not yet ended, indicate “current” or “ongoing.”)

Add rows as needed for each activity.

To report activities that generate revenues for your institution, see Part B, Question 4.

| <i>Company</i> | <i>Description</i> | <i>End Date</i> | <i>For ASH Internal Use</i> |
|----------------|--------------------|-----------------|-----------------------------|
|                |                    |                 |                             |
|                |                    |                 |                             |
|                |                    |                 |                             |

### Industry-Funded Research

4. Do you currently or in the past 24 months have you been involved in research funded or supported (e.g., in kind support) by any for-profit company that develops, produces, markets, or distributes drugs, devices, services, or therapies used to diagnose, treat, monitor, manage, or alleviate health conditions?

No

Yes, as described below:

Column 1 Name the company funding or supporting the research.

Column 2 Briefly describe the research project. Indicate if funding or support goes to you directly or to your institution.

Column 3 Describe your role: (a) national or overall principal investigator, (b) member of a steering committee of a study that does not have a principal investigator, (c) site or local investigator. If other than these options, please describe.

Column 4 Indicate when your involvement ended, if applicable. (If your involvement has not yet ended, indicate “current” or “ongoing.”)

Add rows as needed for each research project.

| <i>Company</i> | <i>Description of Research</i>                                                                                               | <i>My Role</i>     | <i>End Date</i> | <i>For ASH Internal Use</i> |
|----------------|------------------------------------------------------------------------------------------------------------------------------|--------------------|-----------------|-----------------------------|
| Pfizer         | Randomised trial of dalteparin in patients with lung cancer (Fragmatic Trial). Pfizer provided in-kind support (dalteparin). | Chief Investigator | March 2015      | Ended before appointment.   |
|                |                                                                                                                              |                    |                 |                             |
|                |                                                                                                                              |                    |                 |                             |

### My Partner’s or Spouse’s Interests

5. Currently or in the past 24 months has *your partner or spouse* had any of the interests described in questions 1-4?

No

Yes, as described below:

Add rows as needed for each interest.

| <i>Company</i> | <i>Description</i> | <i>End Date</i> | <i>For ASH Internal Use</i> |
|----------------|--------------------|-----------------|-----------------------------|
|                |                    |                 |                             |
|                |                    |                 |                             |
|                |                    |                 |                             |

## Part B. Interests That Are Not Mainly Financial

You have been invited by ASH to participate in the development of clinical practice guidelines on the following topic(s):

Prevention and Treatment of VTE in Patients with Cancer

The questions that follow are designed to elicit information about personal beliefs, intellectual positions or opinions, institutional relationships, and other interests that are not mainly financial and that may be relevant to guidelines on the above topic(s).

### Personal Beliefs

1. Do you have strongly held beliefs related to the topic of these guidelines?

No

Yes

If yes, please explain:

### Previously Published Opinions

2. Have you ever authored, coauthored, or publicly provided an opinion related to the topic of these guidelines, e.g., a clinical practice guideline, textbook, review article, meeting poster or presentation, grand rounds talk, letter to the editor?

No

Yes

If yes, what were those views and where were they made?

Antithrombotic therapy and survival in patients with malignant disease. Kakkar AK, Macbeth F. Br J Cancer. 2010 Apr 13; 102 Suppl 1:S24-9.

I presented the interim results of the Fragmatic trial at the World Lung Cancer Conference in Sydney in 2013 and at the British Thoracic Oncology Group Meeting in Dublin in January 2014

## Research

3. Currently or in the past 24 months, have you been involved in a leadership role in any research project not already reported under Part A, Question 4, relevant to the topic of these guidelines, e.g., a research project funded by a nonprofit or governmental organization?

- No
- Yes, as described below:

Column 1 Name the entity funding the research.

Column 2 Describe the research project.

Column 3 Describe your role: (a) national or overall principal investigator, (b) member of a steering committee of a study that does not have a principal investigator, (c) site or local investigator. If other than these options, please describe.

Column 4 Indicate when your involvement ended, if applicable. (If your involvement has not yet ended, indicate “current” or “ongoing.”)

Add rows as needed for each research project.

| <i>Funder</i> | <i>Description of Research</i> | <i>My Role</i> | <i>End Date</i> |
|---------------|--------------------------------|----------------|-----------------|
|               |                                |                |                 |
|               |                                |                |                 |
|               |                                |                |                 |
|               |                                |                |                 |

## Institutional Relationships

4. Do you generate revenues or nonfinancial benefits for your institution by teaching, speaking, consulting, testifying, writing, or otherwise sharing your knowledge or opinions about this guideline topic?

- Don't know
- No
- Yes

If yes, please explain:

5. Could your institution benefit or be harmed by recommendations of guidelines on this topic?

Don't know

No

Yes

If yes, please explain:

## Career Advancement

6. How would you characterize the support you would receive from your primary mentor, institution, or other entities if your work on this panel or authorship of these guidelines generated a strong reaction from peers outside your institution?

I would hope that they would respect my independent opinion and the robustness of the guideline process and support me.

## Advocacy and Policy Positions

7. Do you work for or are you a member of an organization with a stated position related to the topic of these guidelines, e.g., position statement, editorial, blog, amicus brief, or legislature or legal testimony?

No

Yes

If yes, are you involved in formulating or voting for positions?

No

Yes

If yes, could recommendations of these guidelines conflict with policies you have promoted or are obligated to follow?

Don't know or not applicable

No

Yes

If yes, please explain:

## Professional Specialty

8. What is your primary clinical specialty or subspecialty?

I worked as a clinical oncologist for many years but am now retired from active clinical practice. I have also worked for over 20 years in various roles on clinical guideline development, with 3 years until 2012 as Director of the Clinical Guidelines program at the National Institute for Health and Care Excellence (NICE).

9. Do you prescribe or otherwise recommend diagnostic tests or treatments that may be addressed by these guidelines?

No

Yes

If yes, please explain:

## Expected Interests

10. Do you expect new financial or nonfinancial interests relevant to the topic of these guidelines not already declared in Part A or Part B of this form?

No

Yes

If yes, please describe:

## Part C. Summary (ASH Internal Use)

ASH will review your disclosures and summarize here interests that are judged to be current, material, and with an affected company. You will then be invited to review our determinations and to agree to make all parts of this form (A, B and C) publically available.

|                            |                                                                            |
|----------------------------|----------------------------------------------------------------------------|
| Name of guideline panel(s) | Guideline Panel on Prevention and Treatment of VTE in Patients with Cancer |
|----------------------------|----------------------------------------------------------------------------|

| <i>Approved to participate?</i> | <i>Status</i>         | <i>Recusal may be required?</i> | <i>Date reviewed by ASH staff</i>              | <i>Notes</i>                                                      |
|---------------------------------|-----------------------|---------------------------------|------------------------------------------------|-------------------------------------------------------------------|
| Yes                             | Unconflicted majority | No                              | 5/1/2015;<br>5/5/2015                          |                                                                   |
| Yes                             | Unconflicted majority | No                              | 2/16/2015<br>Alexander;<br>2/21/2017<br>Kunkle | See Part D.                                                       |
| Yes                             |                       |                                 | 6/8/2020<br>Alexander                          | On 5/22/2020, Dr. Macbeth confirmed all information in this form. |
|                                 |                       |                                 |                                                |                                                                   |

If status is conflicted minority, summarize all current material interests in affected companies:

| <i>Company</i> | <i>Description</i> | <i>Disclosure Date</i> | <i>ASH Notes</i> |
|----------------|--------------------|------------------------|------------------|
|                |                    |                        |                  |
|                |                    |                        |                  |
|                |                    |                        |                  |
|                |                    |                        |                  |

Notes:

|  |
|--|
|  |
|--|



## Part D. New Declarations

The following interests were disclosed after appointment:

| <i>Company</i> | <i>Description</i>                                                                                                                                                                                      | <i>Disclosure Date</i> | <i>ASH Internal Notes</i>                                                                                                                                                                                                                        |
|----------------|---------------------------------------------------------------------------------------------------------------------------------------------------------------------------------------------------------|------------------------|--------------------------------------------------------------------------------------------------------------------------------------------------------------------------------------------------------------------------------------------------|
| N/A            | New publication:<br>FRAGMATIC trial.<br>Macbeth F, Noble S,<br>Evans J, et al. J DOI:<br>10.1200/JCO.2015.64.0<br>268 <i>Journal of Clinical<br/>Oncology</i> 34, no. 5<br>(February 2016) 488-<br>494. | 2/2/2017               | Dr. Macbeth's role in<br>this trial that was<br>supported by Pfizer<br>was previously<br>disclosed: See Part A,<br>Question 4. The trial<br>and its funding ended<br>in 2015, before Dr.<br>Macbeth's<br>appointment to this<br>guideline panel. |
|                |                                                                                                                                                                                                         |                        |                                                                                                                                                                                                                                                  |
|                |                                                                                                                                                                                                         |                        |                                                                                                                                                                                                                                                  |
|                |                                                                                                                                                                                                         |                        |                                                                                                                                                                                                                                                  |



# ASH Guideline Panel Declarations of Interest Form

## Part A. Material Interests in Companies

### Equity

1. Do you currently or in the past 24 months have you had equity in any for-profit company that develops, produces, markets, or distributes drugs, devices, services, or therapies used to diagnose, treat, monitor, manage, or alleviate health conditions? Equity includes stock, stock options, and other ownership interests but excludes diversified mutual fund shares.

No

Yes, as described below:

Add rows as needed for each equity interest.

| <i>Company</i> | <i>Description</i> | <i>Date Divested</i> | <i>For ASH Internal Use</i> |
|----------------|--------------------|----------------------|-----------------------------|
|                |                    |                      |                             |
|                |                    |                      |                             |

### Patents and Royalties

2. Do you currently or in the past 24 months have you owned patents for or received royalties from any intellectual property or product used to diagnose, treat, monitor, manage, or alleviate health conditions?

No

Yes, as described below:

Add rows as needed for each patent or royalty interest.

| <i>Company</i> | <i>Description</i> | <i>Date Divested</i> | <i>For ASH Internal Use</i> |
|----------------|--------------------|----------------------|-----------------------------|
|                |                    |                      |                             |
|                |                    |                      |                             |

### Personal Income or Other Remuneration

3. Do you currently or in the past 24 months have you received personal income or other remuneration (e.g., reimbursement or financial support for the costs of travel) from any for-profit company that develops, produces, markets, or distributes drugs, devices, services, or therapies used to diagnose, treat, monitor, manage, or alleviate health conditions?

No

Yes, as described below:

Column 1 Name the company.

Column 2 Describe the activity for which you received income or other remuneration, e.g., employment, consultancy, speakers bureau involvement, service on an advisory committee or board, expert testimony.

Column 3 Indicate when the activity ended, if applicable. (If the activity has not yet ended, indicate “current” or “ongoing.”)

Add rows as needed for each activity.

To report activities that generate revenues for your institution, see Part B, Question 4.

| <i>Company</i> | <i>Description</i> | <i>End Date</i> | <i>For ASH Internal Use</i> |
|----------------|--------------------|-----------------|-----------------------------|
|                |                    |                 |                             |
|                |                    |                 |                             |
|                |                    |                 |                             |

### Industry-Funded Research

4. Do you currently or in the past 24 months have you been involved in research funded or supported (e.g., in kind support) by any for-profit company that develops, produces, markets, or distributes drugs, devices, services, or therapies used to diagnose, treat, monitor, manage, or alleviate health conditions?

No

Yes, as described below:

Column 1 Name the company funding or supporting the research.

Column 2 Briefly describe the research project. Indicate if funding or support goes to you directly or to your institution.

Column 3 Describe your role: (a) national or overall principal investigator, (b) member of a steering committee of a study that does not have a principal investigator, (c) site or local investigator. If other than these options, please describe.

Column 4 Indicate when your involvement ended, if applicable. (If your involvement has not yet ended, indicate “current” or “ongoing.”)

Add rows as needed for each research project.

| <i>Company</i> | <i>Description of Research</i> | <i>My Role</i> | <i>End Date</i> | <i>For ASH Internal Use</i> |
|----------------|--------------------------------|----------------|-----------------|-----------------------------|
|                |                                |                |                 |                             |
|                |                                |                |                 |                             |
|                |                                |                |                 |                             |

### My Partner’s or Spouse’s Interests

5. Currently or in the past 24 months has *your partner or spouse* had any of the interests described in questions 1-4?

No

Yes, as described below:

Add rows as needed for each interest.

| <i>Company</i> | <i>Description</i> | <i>End Date</i> | <i>For ASH Internal Use</i> |
|----------------|--------------------|-----------------|-----------------------------|
|                |                    |                 |                             |
|                |                    |                 |                             |
|                |                    |                 |                             |

## Part B. Interests That Are Not Mainly Financial

You have been invited by ASH to participate in the development of clinical practice guidelines on the following topic(s):

Prevention and Treatment of VTE in Patients with Cancer

The questions that follow are designed to elicit information about personal beliefs, intellectual positions or opinions, institutional relationships, and other interests that are not mainly financial and that may be relevant to guidelines on the above topic(s).

### Personal Beliefs

1. Do you have strongly held beliefs related to the topic of these guidelines?

No

Yes

If yes, please explain:

### Previously Published Opinions

2. Have you ever authored, coauthored, or publicly provided an opinion related to the topic of these guidelines, e.g., a clinical practice guideline, textbook, review article, meeting poster or presentation, grand rounds talk, letter to the editor?

No

Yes

If yes, what were those views and where were they made?

### Research

3. Currently or in the past 24 months, have you been involved in a leadership role in any research project not already reported under Part A, Question 4, relevant to the topic of these guidelines, e.g., a research project funded by a nonprofit or governmental organization?

No

Yes, as described below:

Column 1 Name the entity funding the research.

Column 2 Describe the research project.

Column 3 Describe your role: (a) national or overall principal investigator, (b) member of a steering committee of a study that does not have a principal investigator, (c) site or local investigator. If other than these options, please describe.

Column 4 Indicate when your involvement ended, if applicable. (If your involvement has not yet ended, indicate “current” or “ongoing.”)

Add rows as needed for each research project.

| <i>Funder</i> | <i>Description of Research</i> | <i>My Role</i> | <i>End Date</i> |
|---------------|--------------------------------|----------------|-----------------|
|               |                                |                |                 |
|               |                                |                |                 |
|               |                                |                |                 |
|               |                                |                |                 |

## Institutional Relationships

4. Do you generate revenues or nonfinancial benefits for your institution by teaching, speaking, consulting, testifying, writing, or otherwise sharing your knowledge or opinions about this guideline topic?

Don't know

No

Yes

If yes, please explain:

5. Could your institution benefit or be harmed by recommendations of guidelines on this topic?

Don't know

No

Yes

If yes, please explain:

## Career Advancement

6. How would you characterize the support you would receive from your primary mentor, institution, or other entities if your work on this panel or authorship of these guidelines generated a strong reaction from peers outside your institution?

None

## Advocacy and Policy Positions

7. Do you work for or are you a member of an organization with a stated position related to the topic of these guidelines, e.g., position statement, editorial, blog, amicus brief, or legislature or legal testimony?

No

Yes

If yes, are you involved in formulating or voting for positions?

No

Yes

If yes, could recommendations of these guidelines conflict with policies you have promoted or are obligated to follow?

Don't know or not applicable

No

Yes

If yes, please explain:

## Professional Specialty

8. What is your primary clinical specialty or subspecialty?

None

9. Do you prescribe or otherwise recommend diagnostic tests or treatments that may be addressed by these guidelines?

No

Yes

If yes, please explain:

## Expected Interests

10. Do you expect new financial or nonfinancial interests relevant to the topic of these guidelines not already declared in Part A or Part B of this form?

No

Yes

If yes, please describe:



## Part C. Summary (ASH Internal Use)

ASH will review your disclosures and summarize here interests that are judged to be current, material, and with an affected company. You will then be invited to review our determinations and to agree to make all parts of this form (A, B and C) publically available.

|                            |                                                                                                                                                                         |
|----------------------------|-------------------------------------------------------------------------------------------------------------------------------------------------------------------------|
| Name of guideline panel(s) | Guideline Panel on Prevention and Treatment of VTE in Patients with Cancer<br>Heparin Induced Thrombocytopenia (systematic review)<br>Thrombophilia (systematic review) |
|----------------------------|-------------------------------------------------------------------------------------------------------------------------------------------------------------------------|

| <i>Approved to participate?</i> | <i>Status</i>         | <i>Recusal may be required?</i> | <i>Reviewer name and date</i> | <i>Notes</i>                                                    |
|---------------------------------|-----------------------|---------------------------------|-------------------------------|-----------------------------------------------------------------|
| Yes                             | Unconflicted majority | No                              | 8/13/15;<br>8/16/15           |                                                                 |
| Yes                             | Unconflicted majority | No                              | 7/8/2018<br>Alexander         | On 7/8/2018, Ms. Morgan confirmed all information in this form. |
| Yes                             |                       |                                 | 6/8/2020<br>Alexander         | On 6/8/2020, Ms. Morgan confirmed all information in this form. |
|                                 |                       |                                 |                               |                                                                 |

If status is conflicted minority, summarize all current material interests in affected companies:

| <i>Company</i> | <i>Description</i> | <i>Disclosure Date</i> | <i>ASH Notes</i> |
|----------------|--------------------|------------------------|------------------|
|                |                    |                        |                  |
|                |                    |                        |                  |
|                |                    |                        |                  |
|                |                    |                        |                  |

Notes:



# ASH Guideline Panel Declarations of Interest Form

## Part A. Material Interests in Companies

### Equity

1. Do you currently or in the past 24 months have you had equity in any for-profit company that develops, produces, markets, or distributes drugs, devices, services, or therapies used to diagnose, treat, monitor, manage, or alleviate health conditions? Equity includes stock, stock options, and other ownership interests but excludes diversified mutual fund shares.

No

Yes, as described below:

Add rows as needed for each equity interest.

| <i>Company</i> | <i>Description</i> | <i>Date Divested</i> | <i>For ASH Internal Use</i> |
|----------------|--------------------|----------------------|-----------------------------|
|                |                    |                      |                             |
|                |                    |                      |                             |

### Patents and Royalties

2. Do you currently or in the past 24 months have you owned patents for or received royalties from any intellectual property or product used to diagnose, treat, monitor, manage, or alleviate health conditions?

No

Yes, as described below:

Add rows as needed for each patent or royalty interest.

| <i>Company</i> | <i>Description</i> | <i>Date Divested</i> | <i>For ASH Internal Use</i> |
|----------------|--------------------|----------------------|-----------------------------|
|                |                    |                      |                             |
|                |                    |                      |                             |

## Personal Income or Other Remuneration

3. Do you currently or in the past 24 months have you received personal income or other remuneration (e.g., reimbursement or financial support for the costs of travel) from any for-profit company that develops, produces, markets, or distributes drugs, devices, services, or therapies used to diagnose, treat, monitor, manage, or alleviate health conditions?

No

Yes, as described below:

Column 1 Name the company.

Column 2 Describe the activity for which you received income or other remuneration, e.g., employment, consultancy, speakers bureau involvement, service on an advisory committee or board, expert testimony.

Column 3 Indicate when the activity ended, if applicable. (If the activity has not yet ended, indicate "current" or "ongoing.")

Add rows as needed for each activity.

To report activities that generate revenues for your institution, see Part B, Question 4.

| <i>Company</i> | <i>Description</i> | <i>End Date</i> | <i>For ASH Internal Use</i> |
|----------------|--------------------|-----------------|-----------------------------|
| Pfizer         | Speakers bureau    | 30/01/2015      | Ended before appointment    |
| Leo Pharma     | Speakers Bureau    | 22/4/2015       | Ended before appointment    |
| BMS            | Advisory Board     | 18/11/2014      | Ended before appointment    |
| Astra Zenaca   | Advisory Board     | 14/10/2014      | Ended before appointment    |
|                |                    |                 |                             |
|                |                    |                 |                             |

## Industry-Funded Research

4. Do you currently or in the past 24 months have you been involved in research funded or supported (e.g., in kind support) by any for-profit company that develops, produces, markets, or distributes drugs, devices, services, or therapies used to diagnose, treat, monitor, manage, or alleviate health conditions?

No

Yes, as described below:

Column 1 Name the company funding or supporting the research.

Column 2 Briefly describe the research project. Indicate if funding or support goes to you directly or to your institution.

Column 3 Describe your role: (a) national or overall principal investigator, (b) member of a steering committee of a study that does not have a principal investigator, (c) site or local investigator. If other than these options, please describe.

Column 4 Indicate when your involvement ended, if applicable. (If your involvement has not yet ended, indicate “current” or “ongoing.”)

Add rows as needed for each research project.

| <i>Company</i> | <i>Description of Research</i>                                                                                                                                                    | <i>My Role</i>  | <i>End Date</i>                                                                      | <i>For ASH Internal Use</i>                                                                                                                                                |
|----------------|-----------------------------------------------------------------------------------------------------------------------------------------------------------------------------------|-----------------|--------------------------------------------------------------------------------------|----------------------------------------------------------------------------------------------------------------------------------------------------------------------------|
| Leo Pharma     | Quality of life study:<br>funding goes to institution.<br><br>Monies to pay for transcription services of qualitative interviews.<br><br>Investigator initiated research project. | CI              | First part of study completed and published.<br>Data analysis of sub studies ongoing | Leo markets tinzaparin, a LMWH. However, the study is mainly completed. Furthermore, Dr. Noble received no direct funding from Leo, and he did not have a leadership role. |
| Pfizer         | FRAGMATIC: RCT of lung cancer patients receiving dalteparin                                                                                                                       | Co-Investigator | Completed.<br>Paper submitted                                                        | Ended before appointment                                                                                                                                                   |
| Leo Pharma     | Patient preference study<br><br>I served on steering committee<br><br>I took no fee<br><br>I am lead author on manuscript                                                         | Co-Investigator | Completed                                                                            | Ended before appointment                                                                                                                                                   |

### My Partner’s or Spouse’s Interests

5. Currently or in the past 24 months has *your partner or spouse* had any of the interests described in questions 1-4?

No

Yes, as described below:

Add rows as needed for each interest.

| <i>Company</i> | <i>Description</i> | <i>End Date</i> | <i>For ASH Internal Use</i> |
|----------------|--------------------|-----------------|-----------------------------|
|                |                    |                 |                             |
|                |                    |                 |                             |
|                |                    |                 |                             |

## Part B. Interests That Are Not Mainly Financial

You have been invited by ASH to participate in the development of clinical practice guidelines on the following topic(s):

Prevention and Treatment of VTE in Patients with Cancer

The questions that follow are designed to elicit information about personal beliefs, intellectual positions or opinions, institutional relationships, and other interests that are not mainly financial and that may be relevant to guidelines on the above topic(s).

### Personal Beliefs

1. Do you have strongly held beliefs related to the topic of these guidelines?

No

Yes

### Previously Published Opinions

2. Have you ever authored, coauthored, or publicly provided an opinion related to the topic of these guidelines, e.g., a clinical practice guideline, textbook, review article, meeting poster or presentation, grand rounds talk, letter to the editor?

No

Yes

If yes, what were those views and where were they made?

1. Noble S. Heparin and survival in cancer: where do we stand? *Thrombosis Research*. 2014 May; 133 Suppl 2:S133-8.
2. Debourdeau P, Farge-Bancel D, Beckers M, Baglin C, Bauersachs R, Brenner B, Brillhante D, Falanga A, Gerotziafas G, Haim N, Kakkar AK, Khorana A, Lecumberri R, Mandala M, Marty M, Monreal M, Mousa S, Noble S, Pabinger I, Prins M, Qari M, Streiff M, Zervas K, Buller H, Bounameaux H. International clinical practice guidelines for the treatment and prophylaxis of thrombosis associated with central venous catheters in patients with cancer. *Journal Thrombosis and Haemostasis* 2013 Jan; 11(1):71-80.
3. Farge-Bancel D, Debourdeau P, Beckers M, Baglin C, Bauersachs R, Brenner B, Brillhante D, Falanga A, Gerotziafas G, Haim N, Kakkar AK, Khorana A, Lecumberri R, Mandala M, Marty M,

- Monreal M, Mousa S, Noble S, Pabinger I, Prins M, Qari M, Streiff M, Zervas K, Bounameaux H, Buller H. International clinical practice guidelines for the treatment and prophylaxis of thrombosis associated in patients with cancer. *Journal Thrombosis and Haemostasis* 2013 Jan;11(1):56-70
4. Carrier M, Khorana AA, Zwicker JI, Noble S, Lee AYY Management of challenging cases of patients with cancer-associated thrombosis including recurrent thrombosis and bleeding: guidance from the SSC of the ISTH. *Journal Thrombosis and Haemostasis* 2013 September; 11(9) 1760-65
  5. Treasure T, Akunne A, Balachander N, Browne J, Carter K, Carter S, Chong LY, Fiddian N, Frostick S, Gautam N, Gregg P, Head K, Hingorani A, Homer K, Hughes R, Hunt B, Langford N, Lewin H, Mainwaring P, McBride D, McPherson G, Noble S, Sharpin C, Sloan N, Stansby G, Walton P, Warwick D, Welch N, Wonderling D, Young A, Young C. Reducing the risk of venous thromboembolism in patients admitted to hospital: summary of NICE guidance. *BMJ*. 2010 Jan 27; 340:c95.
  6. Noble SI, Shelley M, Coles B, Williams S, Wilcock A, Johnson M. The management of venous thromboembolism in advanced cancer: a systematic review and meta-analysis by the thrombosis task group, on behalf of the Association for Palliative Medicine Science Committee. *Lancet Oncology* 2008, 9(6):577-84

## Research

3. Currently or in the past 24 months, have you been involved in a leadership role in any research project not already reported under Part A, Question 4, relevant to the topic of these guidelines, e.g., a research project funded by a nonprofit or governmental organization?

No

Yes, as described below:

Column 1 Name the entity funding the research.

Column 2 Describe the research project.

Column 3 Describe your role: (a) national or overall principal investigator, (b) member of a steering committee of a study that does not have a principal investigator, (c) site or local investigator. If other than these options, please describe.

Column 4 Indicate when your involvement ended, if applicable. (If your involvement has not yet ended, indicate "current" or "ongoing.")

Add rows as needed for each research project.

| <i>Funder</i> | <i>Description of Research</i> | <i>My Role</i> | <i>End Date</i> |
|---------------|--------------------------------|----------------|-----------------|
|               |                                |                |                 |
|               |                                |                |                 |
|               |                                |                |                 |
|               |                                |                |                 |

## Institutional Relationships

4. Do you generate revenues or nonfinancial benefits for your institution by teaching, speaking, consulting, testifying, writing, or otherwise sharing your knowledge or opinions about this guideline topic?

Don't know

No

Yes

If yes, please explain:

5. Could your institution benefit or be harmed by recommendations of guidelines on this topic?

Don't know

No

Yes

If yes, please explain:

## Career Advancement

6. How would you characterize the support you would receive from your primary mentor, institution, or other entities if your work on this panel or authorship of these guidelines generated a strong reaction from peers outside your institution?

Having previously served on the NICE guidelines (CG93) I know that my organization would be supportive should guidelines generate a strong reaction.

## Advocacy and Policy Positions

7. Do you work for or are you a member of an organization with a stated position related to the topic of these guidelines, e.g., position statement, editorial, blog, amicus brief, or legislature or legal testimony?

No

Yes

If yes, are you involved in formulating or voting for positions?

No

Yes



If yes, could recommendations of these guidelines conflict with policies you have promoted or are obligated to follow?

Don't know or not applicable

No

Yes

If yes, please explain:

## Professional Specialty

8. What is your primary clinical specialty or subspecialty?

Clinical Reader in Palliative Medicine Cardiff University

9. Do you prescribe or otherwise recommend diagnostic tests or treatments that may be addressed by these guidelines?

No

Yes

If yes, please explain:

I am involved in the management of cancer associated thrombosis and currently prescribe according to current ACCP Guidelines

## Expected Interests

10. Do you expect new financial or nonfinancial interests relevant to the topic of these guidelines not already declared in Part A or Part B of this form?

No

Yes

If yes, please describe:

I have already made a declaration that I shall take on no further advisory boards or take on research activities funded or supported by industry.

Furthermore, if ever involved in any speaking engagements, I shall take no financial or other sort of remunerations.

## Part C. Summary (ASH Internal Use)

ASH will review your disclosures and summarize here interests that are judged to be current, material, and with an affected company. You will then be invited to review our determinations and to agree to make all parts of this form (A, B and C) publically available.

|                            |                                                         |
|----------------------------|---------------------------------------------------------|
| Name of guideline panel(s) | Prevention and Treatment of VTE in Patients with Cancer |
|----------------------------|---------------------------------------------------------|

| <i>Approved to participate?</i> | <i>Status</i>         | <i>Recusal may be required?</i> | <i>Reviewer Name and Date</i>                  | <i>Notes</i>                                                          |
|---------------------------------|-----------------------|---------------------------------|------------------------------------------------|-----------------------------------------------------------------------|
| Yes                             | Unconflicted majority | No                              | 5/1/2015;<br>5/5/2015                          | Dr. Noble agrees to remain unconflicted during guideline development. |
| Yes                             | Unconflicted majority | No                              | 2/14/2017<br>Alexander;<br>2/21/2017<br>Kunkle | New disclosure. See Part D.                                           |
| Yes                             |                       |                                 | 6/8/2020<br>Alexander                          | On 5/26/2020, Dr. Noble confirmed all information in this form.       |
|                                 |                       |                                 |                                                |                                                                       |

If status is conflicted minority, summarize all current material interests in affected companies:

| <i>Company</i> | <i>Description</i> | <i>Disclosure Date</i> | <i>ASH Notes</i> |
|----------------|--------------------|------------------------|------------------|
|                |                    |                        |                  |
|                |                    |                        |                  |
|                |                    |                        |                  |
|                |                    |                        |                  |

Notes:

|  |
|--|
|  |
|--|

## Part D. New Declarations

The following interests were disclosed after appointment:

| <i>Company</i> | <i>Description</i>                                                                      | <i>Disclosure Date</i> | <i>ASH Internal Notes</i>                                                                             |
|----------------|-----------------------------------------------------------------------------------------|------------------------|-------------------------------------------------------------------------------------------------------|
| N/A            | Dr. Noble is now a Clinical Professor in Palliative Care at Cardiff School of Medicine. | 02/02/2017             | This is an update to Dr. Noble's previously disclosed professional specialty. See Part B, Question 8. |
|                |                                                                                         |                        |                                                                                                       |
|                |                                                                                         |                        |                                                                                                       |
|                |                                                                                         |                        |                                                                                                       |

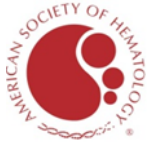

# ASH Guideline Panel Declarations of Interest Form

## Part A. Material Interests in Companies

### Equity

1. Do you currently or in the past 24 months have you had equity in any for-profit company that develops, produces, markets, or distributes drugs, devices, services, or therapies used to diagnose, treat, monitor, manage, or alleviate health conditions? Equity includes stock, stock options, and other ownership interests but excludes diversified mutual fund shares.

No

Yes, as described below:

Add rows as needed for each equity interest.

| <i>Company</i> | <i>Description</i> | <i>Date Divested</i> | <i>For ASH Internal Use</i> |
|----------------|--------------------|----------------------|-----------------------------|
|                |                    |                      |                             |
|                |                    |                      |                             |

### Patents and Royalties

2. Do you currently or in the past 24 months have you owned patents for or received royalties from any intellectual property or product used to diagnose, treat, monitor, manage, or alleviate health conditions?

No

Yes, as described below:

Add rows as needed for each patent or royalty interest.

| <i>Company</i> | <i>Description</i> | <i>Date Divested</i> | <i>For ASH Internal Use</i> |
|----------------|--------------------|----------------------|-----------------------------|
|                |                    |                      |                             |
|                |                    |                      |                             |

### Personal Income or Other Remuneration

3. Do you currently or in the past 24 months have you received personal income or other remuneration (e.g., reimbursement or financial support for the costs of travel) from any for-profit company that develops, produces, markets, or distributes drugs, devices, services, or therapies used to diagnose, treat, monitor, manage, or alleviate health conditions?

No

Yes, as described below:

Column 1 Name the company.

Column 2 Describe the activity for which you received income or other remuneration, e.g., employment, consultancy, speakers bureau involvement, service on an advisory committee or board, expert testimony.

Column 3 Indicate when the activity ended, if applicable. (If the activity has not yet ended, indicate “current” or “ongoing.”)

Add rows as needed for each activity.

To report activities that generate revenues for your institution, see Part B, Question 4.

| <i>Company</i> | <i>Description</i> | <i>End Date</i> | <i>For ASH Internal Use</i> |
|----------------|--------------------|-----------------|-----------------------------|
|                |                    |                 |                             |
|                |                    |                 |                             |
|                |                    |                 |                             |

### Industry-Funded Research

4. Do you currently or in the past 24 months have you been involved in research funded or supported (e.g., in kind support) by any for-profit company that develops, produces, markets, or distributes drugs, devices, services, or therapies used to diagnose, treat, monitor, manage, or alleviate health conditions?

No

Yes, as described below:

Column 1 Name the company funding or supporting the research.

Column 2 Briefly describe the research project. Indicate if funding or support goes to you directly or to your institution.

Column 3 Describe your role: (a) national or overall principal investigator, (b) member of a steering committee of a study that does not have a principal investigator, (c) site or local investigator. If other than these options, please describe.

Column 4 Indicate when your involvement ended, if applicable. (If your involvement has not yet ended, indicate “current” or “ongoing.”)

Add rows as needed for each research project.

| <i>Company</i> | <i>Description of Research</i> | <i>My Role</i> | <i>End Date</i> | <i>For ASH Internal Use</i> |
|----------------|--------------------------------|----------------|-----------------|-----------------------------|
|                |                                |                |                 |                             |
|                |                                |                |                 |                             |
|                |                                |                |                 |                             |

### My Partner’s or Spouse’s Interests

5. Currently or in the past 24 months has *your partner or spouse* had any of the interests described in questions 1-4?

No

Yes, as described below:

Add rows as needed for each interest.

| <i>Company</i> | <i>Description</i> | <i>End Date</i> | <i>For ASH Internal Use</i> |
|----------------|--------------------|-----------------|-----------------------------|
|                |                    |                 |                             |
|                |                    |                 |                             |
|                |                    |                 |                             |

# Part B. Interests That Are Not Mainly Financial

You have been invited by ASH to participate in the development of clinical practice guidelines on the following topic(s):

| Topic                                                   | Guideline Panel                                                            |
|---------------------------------------------------------|----------------------------------------------------------------------------|
| Venous thromboembolism (VTE)                            | VTE Guideline Coordination Panel                                           |
| Prevention of VTE in medical hospitalized patients      | Guideline Panel on Prevention of VTE in Medical Hospitalized Patients      |
| Prevention and treatment of VTE in patients with cancer | Guideline Panel on Prevention and Treatment of VTE in Patients with Cancer |
| Diagnosis of VTE                                        | Guideline Panel on Diagnosis of VTE                                        |

The questions that follow are designed to elicit information about personal beliefs, intellectual positions or opinions, institutional relationships, and other interests that are not mainly financial and that may be relevant to guidelines on the above topic(s).

## Personal Beliefs

1. Do you have strongly held beliefs related to the topic of these guidelines?

No

Yes

If yes, please explain:

## Previously Published Opinions

2. Have you ever authored, coauthored, or publicly provided an opinion related to the topic of these guidelines, e.g., a clinical practice guideline, textbook, review article, meeting poster or presentation, grand rounds talk, letter to the editor?

No

Yes

If yes, what were those views and where were they made?

- ACCP AT Guidelines
- CHEST since edition 6 to 9
- Cochrane reviews on antithrombotic use in patients with cancer
- NEJM editorial on update of a systematic review on antithrombotics with cancer

- JAMA Clinical Synopsis – heparin in cancer patients undergoing surgery

## Research

3. Currently or in the past 24 months, have you been involved in a leadership role in any research project not already reported under Part A, Question 4, relevant to the topic of these guidelines, e.g., a research project funded by a nonprofit or governmental organization?

- No
- Yes, as described below:

Column 1 Name the entity funding the research.

Column 2 Describe the research project.

Column 3 Describe your role: (a) national or overall principal investigator, (b) member of a steering committee of a study that does not have a principal investigator, (c) site or local investigator. If other than these options, please describe.

Column 4 Indicate when your involvement ended, if applicable. (If your involvement has not yet ended, indicate “current” or “ongoing.”)

Add rows as needed for each research project.

| <i>Funder</i> | <i>Description of Research</i>                                  | <i>My Role</i> | <i>End Date</i> |
|---------------|-----------------------------------------------------------------|----------------|-----------------|
| CIHR          | Individual patient data meta-analysis antithrombotics in cancer | PI             | Mach 2016       |
|               |                                                                 |                |                 |
|               |                                                                 |                |                 |
|               |                                                                 |                |                 |

## Institutional Relationships

4. Do you generate revenues or nonfinancial benefits for your institution by teaching, speaking, consulting, testifying, writing, or otherwise sharing your knowledge or opinions about this guideline topic?

- Don't know
- No
- Yes

If yes, please explain:

Contract for systematic reviews for these guidelines being negotiated with ASH



5. Could your institution benefit or be harmed by recommendations of guidelines on this topic?

Don't know

No

Yes

If yes, please explain:

## Career Advancement

6. How would you characterize the support you would receive from your primary mentor, institution, or other entities if your work on this panel or authorship of these guidelines generated a strong reaction from peers outside your institution?

N/A

## Advocacy and Policy Positions

7. Do you work for or are you a member of an organization with a stated position related to the topic of these guidelines, e.g., position statement, editorial, blog, amicus brief, or legislature or legal testimony?

No

Yes

If yes, are you involved in formulating or voting for positions?

No

Yes

If yes, could recommendations of these guidelines conflict with policies you have promoted or are obligated to follow?

Don't know or not applicable

No

Yes

If yes, please explain:

## Professional Specialty

8. What is your primary clinical specialty or subspecialty?

Internal Medicine, Public Health, preventive medicine

9. Do you prescribe or otherwise recommend diagnostic tests or treatments that may be addressed by these guidelines?

No

Yes

If yes, please explain:

Diagnosis and treatment of DVT

### Expected Interests

10. Do you expect new financial or nonfinancial interests relevant to the topic of these guidelines not already declared in Part A or Part B of this form?

No

Yes

If yes, please describe:

## Part C. Summary (ASH Internal Use)

ASH will review your disclosures and summarize here interests that are judged to be current, material, and with an affected company. You will then be invited to review our determinations and to agree to make all parts of this form (A, B and C) publically available.

|                            |                                                                                                                                                                                                                                |
|----------------------------|--------------------------------------------------------------------------------------------------------------------------------------------------------------------------------------------------------------------------------|
| Name of guideline panel(s) | VTE Guideline Coordination Panel<br>Guideline Panel on Diagnosis of VTE<br>Guideline Panel on Prevention of VTE in Medical Hospitalized Patients<br>Guideline Panel on Prevention and Treatment of VTE in Patients with Cancer |
|----------------------------|--------------------------------------------------------------------------------------------------------------------------------------------------------------------------------------------------------------------------------|

| <i>Approved to participate?</i> | <i>Status</i>         | <i>Recusal may be required?</i> | <i>Date reviewed by ASH staff</i> | <i>Notes</i>                                                         |
|---------------------------------|-----------------------|---------------------------------|-----------------------------------|----------------------------------------------------------------------|
| Yes                             | Unconflicted majority | No                              | 5/1/2015;<br>5/5/2015             |                                                                      |
| Yes                             | Unconflicted majority | No                              | 4/26/2018<br>Alexander            | On 4/26/2018, Dr. Schunemann confirmed all information in this form. |
|                                 |                       |                                 |                                   |                                                                      |
|                                 |                       |                                 |                                   |                                                                      |

If status is conflicted minority, summarize all current material interests in affected companies:

| <i>Company</i> | <i>Description</i> | <i>Disclosure Date</i> | <i>ASH Notes</i> |
|----------------|--------------------|------------------------|------------------|
|                |                    |                        |                  |
|                |                    |                        |                  |
|                |                    |                        |                  |
|                |                    |                        |                  |

Notes:

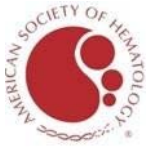

# ASH Guideline Panel Declarations of Interest Form

## Part A. Material Interests in Companies

### Equity

1. Do you currently or in the past 24 months have you had equity in any for-profit company that develops, produces, markets, or distributes drugs, devices, services, or therapies used to diagnose, treat, monitor, manage, or alleviate health conditions? Equity includes stock, stock options, and other ownership interests but excludes diversified mutual fund shares.

No

Yes, as described below:

Add rows as needed for each equity interest.

| <i>Company</i> | <i>Description</i> | <i>Date Divested</i> | <i>For ASH Internal Use</i> |
|----------------|--------------------|----------------------|-----------------------------|
|                |                    |                      |                             |
|                |                    |                      |                             |
|                |                    |                      |                             |
|                |                    |                      |                             |

|  |  |  |  |
|--|--|--|--|
|  |  |  |  |
|--|--|--|--|

## Patents and Royalties

2. Do you currently or in the past 24 months have you owned patents for or received royalties from any intellectual property or product used to diagnose, treat, monitor, manage, or alleviate health conditions?

No

Yes, as described below:

Add rows as needed for each patent or royalty interest.

| <i>Company</i> | <i>Description</i> | <i>Date Divested</i> | <i>For ASH Internal Use</i> |
|----------------|--------------------|----------------------|-----------------------------|
|                |                    |                      |                             |
|                |                    |                      |                             |
|                |                    |                      |                             |
|                |                    |                      |                             |

## Personal Income or Other Remuneration

3. Do you currently or in the past 24 months have you received personal income or other remuneration (e.g., reimbursement or financial support for the costs of travel) from any for-profit company that develops, produces, markets, or distributes drugs, devices, services, or therapies used to diagnose, treat, monitor, manage, or alleviate health conditions?

No

Yes, as described below:

Column 1 Name the company.

Column 2 Describe the activity for which you received income or other remuneration, e.g., employment, consultancy, speakers bureau involvement, service on an advisory committee or board, expert testimony.

Column 3 Indicate when the activity ended, if applicable. (If the activity has not yet ended, indicate "current" or "ongoing.")

Add rows as needed for each activity.

To report activities that generate revenues for your institution, see Part B, Question 4.

| <i>Company</i> | <i>Description</i> | <i>End Date</i> | <i>For ASH Internal Use</i> |
|----------------|--------------------|-----------------|-----------------------------|
|                |                    |                 |                             |
|                |                    |                 |                             |
|                |                    |                 |                             |
|                |                    |                 |                             |
|                |                    |                 |                             |
|                |                    |                 |                             |
|                |                    |                 |                             |
|                |                    |                 |                             |
|                |                    |                 |                             |

### Industry-Funded Research

4. Do you currently or in the past 24 months have you been involved in research funded or supported (e.g., in kind support) by any for-profit company that develops, produces, markets, or distributes drugs, devices, services, or therapies used to diagnose, treat, monitor, manage, or alleviate health conditions?

No

Yes, as described below:

Column 1 Name the company funding or supporting the research.

Column 2 Briefly describe the research project. Indicate if funding or support goes to you directly or to your institution.

Column 3 Describe your role: (a) national or overall principal investigator, (b) member of a steering committee of a study that does not have a principal investigator, (c) site or local investigator. If other than these options, please describe.

Column 4 Indicate when your involvement ended, if applicable. (If your involvement has not yet ended, indicate "current" or "ongoing.") Add rows as needed for each research project.

| Company                                 | Description of Research                                                                    | My Role                                    | End Date   | For ASH Internal Use                                                         |
|-----------------------------------------|--------------------------------------------------------------------------------------------|--------------------------------------------|------------|------------------------------------------------------------------------------|
| CPP (Cancer Prevention Pharmaceuticals) | Oral interventional drug in the treatment of FAP (familial adenomatous polyposis) patients | Administrator<br>Not funded on the project | 08/14/2015 | Not a COI: Research is not VTE related +she does not hold a leadership role. |
|                                         |                                                                                            |                                            |            |                                                                              |
|                                         |                                                                                            |                                            |            |                                                                              |
|                                         |                                                                                            |                                            |            |                                                                              |
|                                         |                                                                                            |                                            |            |                                                                              |
|                                         |                                                                                            |                                            |            |                                                                              |
|                                         |                                                                                            |                                            |            |                                                                              |
|                                         |                                                                                            |                                            |            |                                                                              |
|                                         |                                                                                            |                                            |            |                                                                              |
|                                         |                                                                                            |                                            |            |                                                                              |

### My Partner's or Spouse's Interests

5. Currently or in the past 24 months has *your partner or spouse* had any of the interests described in questions 1-4?

No

Yes, as described below:

Add rows as needed for each interest.

| <i>Company</i> | <i>Description</i> | <i>End Date</i> | <i>For ASH Internal Use</i> |
|----------------|--------------------|-----------------|-----------------------------|
|                |                    |                 |                             |
|                |                    |                 |                             |
|                |                    |                 |                             |



# Part B. Interests That Are Not Mainly Financial

You have been invited by ASH to participate in the development of clinical practice guidelines on the following topic(s):

VTE in Patients with Cancer

The questions that follow are designed to elicit information about personal beliefs, intellectual positions or opinions, institutional relationships, and other interests that are not mainly financial and that may be relevant to guidelines on the above topic(s).

## Personal Beliefs

1. Do you have strongly held beliefs related to the topic of these guidelines?

No

Yes

If yes, please explain: It is integral to identify preventative opportunities to improve the standard of care of cancer patients so as not to add to their burden.

## Previously Published Opinions

2. Have you ever authored, coauthored, or publicly provided an opinion related to the topic of these guidelines, e.g., a clinical practice guideline, textbook, review article, meeting poster or presentation, grand rounds talk, letter to the editor?

No

Yes

If yes, what were those views and where were they made?

## Research

3. Currently or in the past 24 months, have you been involved in a leadership role in any research project not already reported under Part A, Question 4, relevant to the topic of these guidelines, e.g., a research project funded by a nonprofit or governmental organization?

No

Yes, as described below:

Column 1 Name the entity funding the research.

Column 2 Describe the research project.

Column 3 Describe your role: (a) national or overall principal investigator, (b) member of a steering committee of a study that does not have a principal investigator, (c) site or local investigator. If other than these options, please describe.

Column 4 Indicate when your involvement ended, if applicable. (If your involvement has not yet ended, indicate "current" or "ongoing.") Add rows as needed for each research project.

| Funder | Description of Research | My Role                                                   | End Date   |
|--------|-------------------------|-----------------------------------------------------------|------------|
| NIH    | Colorectal cancer       | Department Administrator/directed personnel and resources | 08/14/2015 |
| NIH    | Breast cancer           | Department Administrator/directed personnel and resources | 08/14/2015 |
| NIH    | Melanoma                | Department Administrator/directed personnel and resources | 08/14/2015 |
|        |                         |                                                           |            |

## Institutional Relationships

4. Do you generate revenues or nonfinancial benefits for your institution by teaching, speaking, consulting, testifying, writing, or otherwise sharing your knowledge or opinions about this guideline topic?

Don't know

No

Yes

If yes, please explain:

5. Could your institution benefit or be harmed by recommendations of guidelines on this topic?

Don't know

No

Yes

If yes, please explain:

## Career Advancement

6. How would you characterize the support you would receive from your primary mentor, institution, or other entities if your work on this panel or authorship of these guidelines generated a strong reaction from peers outside your institution?

I will continue to be seen as a member of the community and would not unduly influence the institution I presently or formerly worked for.

## Advocacy and Policy Positions

7. Do you work for or are you a member of an organization with a stated position related to the topic of these guidelines, e.g., position statement, editorial, blog, amicus brief, or legislature or legal testimony?

No

Yes

If yes, are you involved in formulating or voting for positions?

No

Yes

If yes, could recommendations of these guidelines conflict with policies you have promoted or are obligated to follow?

Don't know or not applicable

No

Yes

If yes, please explain:

## Professional Specialty

8. What is your primary clinical specialty or subspecialty?

Certified Rehabilitation Counselor. I only volunteer these services now and I work in an administrative role.

9. Do you prescribe or otherwise recommend diagnostic tests or treatments that may be addressed by these guidelines?

No

Yes

If yes, please explain:

## Expected Interests

10. Do you expect new financial or nonfinancial interests relevant to the topic of these guidelines not already declared in Part A or Part B of this form?

No

Yes

If yes, please describe:

## Part C. Summary (ASH Internal Use)

ASH will review your disclosures and summarize here interests that are judged to be current, material, and with an affected company. You will then be invited to review our determinations and to agree to make all parts of this form (A, B and C) publically available.

|                            |                                                                            |
|----------------------------|----------------------------------------------------------------------------|
| Name of guideline panel(s) | Guideline Panel on Prevention and Treatment of VTE in Patients With Cancer |
|----------------------------|----------------------------------------------------------------------------|

| <i>Approved to participate?</i> | <i>Status</i>         | <i>Recusal may be required?</i> | <i>Reviewer Name and Date</i> | <i>Notes</i>                                                     |
|---------------------------------|-----------------------|---------------------------------|-------------------------------|------------------------------------------------------------------|
| Yes                             | Unconflicted majority | No                              | 8/11/15;<br>8/16/15           |                                                                  |
| Yes                             | Unconflicted majority | No                              | 6/10/2020<br>Alexander        | On 6/10/2020, Ms. Sexton confirmed all information in this form. |
|                                 |                       |                                 |                               |                                                                  |
|                                 |                       |                                 |                               |                                                                  |

If status is conflicted minority, summarize all current material interests in affected companies:

| <i>Company</i> | <i>Description</i> | <i>Disclosure Date</i> | <i>ASH Notes</i> |
|----------------|--------------------|------------------------|------------------|
|                |                    |                        |                  |

|  |  |  |  |
|--|--|--|--|
|  |  |  |  |
|  |  |  |  |
|  |  |  |  |
|  |  |  |  |

Notes:

|  |
|--|
|  |
|--|



# ASH Guideline Panel Declarations of Interest Form

## Part A. Material Interests in Companies

### Equity

1. Do you currently or in the past 24 months have you had equity in any for-profit company that develops, produces, markets, or distributes drugs, devices, services, or therapies used to diagnose, treat, monitor, manage, or alleviate health conditions? Equity includes stock, stock options, and other ownership interests but excludes diversified mutual fund shares.

No

Yes, as described below:

Add rows as needed for each equity interest.

| <i>Company</i> | <i>Description</i> | <i>Date Divested</i> | <i>For ASH Internal Use</i> |
|----------------|--------------------|----------------------|-----------------------------|
|                |                    |                      |                             |
|                |                    |                      |                             |

### Patents and Royalties

2. Do you currently or in the past 24 months have you owned patents for or received royalties from any intellectual property or product used to diagnose, treat, monitor, manage, or alleviate health conditions?

No

Yes, as described below:

Add rows as needed for each patent or royalty interest.

| <i>Company</i> | <i>Description</i> | <i>Date Divested</i> | <i>For ASH Internal Use</i> |
|----------------|--------------------|----------------------|-----------------------------|
|                |                    |                      |                             |
|                |                    |                      |                             |

### Personal Income or Other Remuneration

3. Do you currently or in the past 24 months have you received personal income or other remuneration (e.g., reimbursement or financial support for the costs of travel) from any for-profit company that develops, produces, markets, or distributes drugs, devices, services, or therapies used to diagnose, treat, monitor, manage, or alleviate health conditions?

No

Yes, as described below:

Column 1 Name the company.

Column 2 Describe the activity for which you received income or other remuneration, e.g., employment, consultancy, speakers bureau involvement, service on an advisory committee or board, expert testimony.

Column 3 Indicate when the activity ended, if applicable. (If the activity has not yet ended, indicate “current” or “ongoing.”)

Add rows as needed for each activity.

To report activities that generate revenues for your institution, see Part B, Question 4.

| <i>Company</i> | <i>Description</i> | <i>End Date</i> | <i>For ASH Internal Use</i> |
|----------------|--------------------|-----------------|-----------------------------|
|                |                    |                 |                             |
|                |                    |                 |                             |
|                |                    |                 |                             |

### Industry-Funded Research

4. Do you currently or in the past 24 months have you been involved in research funded or supported (e.g., in kind support) by any for-profit company that develops, produces, markets, or distributes drugs, devices, services, or therapies used to diagnose, treat, monitor, manage, or alleviate health conditions?

No

Yes, as described below:

Column 1 Name the company funding or supporting the research.

Column 2 Briefly describe the research project. Indicate if funding or support goes to you directly or to your institution.



Column 3 Describe your role: (a) national or overall principal investigator, (b) member of a steering committee of a study that does not have a principal investigator, (c) site or local investigator. If other than these options, please describe.

Column 4 Indicate when your involvement ended, if applicable. (If your involvement has not yet ended, indicate “current” or “ongoing.”)

Add rows as needed for each research project.

| <i>Company</i>       | <i>Description of Research</i>                                                       | <i>My Role</i> | <i>End Date</i> | <i>For ASH Internal Use</i>                                                                                                                                          |
|----------------------|--------------------------------------------------------------------------------------|----------------|-----------------|----------------------------------------------------------------------------------------------------------------------------------------------------------------------|
| Myriad Laboratories  | Research related to cost-effectiveness of BRCA testing and use of genetic counselors | PI/Co-I        | Dec 2016        | Not an affected company                                                                                                                                              |
| AstraZeneca          | Outcomes study of BRCA tested breast cancer patients                                 | PI             | Jan 2016        | AstraZeneca does not have any products related to VTE.                                                                                                               |
| Bristol-Myers Squibb | Patient preference survey in melanoma                                                | Co-I           | Dec 2016        | NO COI: BMS markets apixaban, however his research is not VTE related. 5/1 Dr. Stenejhem confirmed he reports to a PI and therefore does not have a leadership role. |

### My Partner’s or Spouse’s Interests

5. Currently or in the past 24 months has *your partner or spouse* had any of the interests described in questions 1-4?

No

Yes, as described below:

Add rows as needed for each interest.

| <i>Company</i> | <i>Description</i> | <i>End Date</i> | <i>For ASH Internal Use</i> |
|----------------|--------------------|-----------------|-----------------------------|
|                |                    |                 |                             |
|                |                    |                 |                             |
|                |                    |                 |                             |

## Part B. Interests That Are Not Mainly Financial

You have been invited by ASH to participate in the development of clinical practice guidelines on the following topic(s):

Prevention and Treatment of VTE in Patients with Cancer

The questions that follow are designed to elicit information about personal beliefs, intellectual positions or opinions, institutional relationships, and other interests that are not mainly financial and that may be relevant to guidelines on the above topic(s).

### Personal Beliefs

1. Do you have strongly held beliefs related to the topic of these guidelines?

No

Yes

If yes, please explain:

### Previously Published Opinions

2. Have you ever authored, coauthored, or publicly provided an opinion related to the topic of these guidelines, e.g., a clinical practice guideline, textbook, review article, meeting poster or presentation, grand rounds talk, letter to the editor?

No

Yes

If yes, what were those views and where were they made?

### Research

3. Currently or in the past 24 months, have you been involved in a leadership role in any research project not already reported under Part A, Question 4, relevant to the topic of these guidelines, e.g., a research project funded by a nonprofit or governmental organization?

No

Yes, as described below:

Column 1 Name the entity funding the research.

Column 2 Describe the research project.

Column 3 Describe your role: (a) national or overall principal investigator, (b) member of a steering committee of a study that does not have a principal investigator, (c) site or local investigator. If other than these options, please describe.

Column 4 Indicate when your involvement ended, if applicable. (If your involvement has not yet ended, indicate "current" or "ongoing.")

Add rows as needed for each research project.

| <i>Funder</i> | <i>Description of Research</i> | <i>My Role</i> | <i>End Date</i> |
|---------------|--------------------------------|----------------|-----------------|
|               |                                |                |                 |
|               |                                |                |                 |
|               |                                |                |                 |
|               |                                |                |                 |

## Institutional Relationships

4. Do you generate revenues or nonfinancial benefits for your institution by teaching, speaking, consulting, testifying, writing, or otherwise sharing your knowledge or opinions about this guideline topic?

Don't know

No

Yes

If yes, please explain:

5. Could your institution benefit or be harmed by recommendations of guidelines on this topic?

Don't know

No

Yes

If yes, please explain:

## Career Advancement

6. How would you characterize the support you would receive from your primary mentor, institution, or other entities if your work on this panel or authorship of these guidelines generated a strong reaction from peers outside your institution?

I would be well supported by my Department Chair, Vice-chair, and by my institution.

## Advocacy and Policy Positions

7. Do you work for or are you a member of an organization with a stated position related to the topic of these guidelines, e.g., position statement, editorial, blog, amicus brief, or legislature or legal testimony?

No

Yes

If yes, are you involved in formulating or voting for positions?

No

Yes

If yes, could recommendations of these guidelines conflict with policies you have promoted or are obligated to follow?

Don't know or not applicable

No

Yes

If yes, please explain:

## Professional Specialty

8. What is your primary clinical specialty or subspecialty?

Clinical pharmacy practice in GI oncology and I am an outcomes researcher.

9. Do you prescribe or otherwise recommend diagnostic tests or treatments that may be addressed by these guidelines?

No

Yes

If yes, please explain:

VTE is commonly encountered in GI oncology and therefore as a clinical pharmacist I help devise treatment plans to prevent or treat VTE in cancer patients.

### Expected Interests

10. Do you expect new financial or nonfinancial interests relevant to the topic of these guidelines not already declared in Part A or Part B of this form?

No

Yes

If yes, please describe:

## Part C. Summary (ASH Internal Use)

ASH will review your disclosures and summarize here interests that are judged to be current, material, and with an affected company. You will then be invited to review our determinations and to agree to make all parts of this form (A, B and C) publically available.

|                            |                                                                            |
|----------------------------|----------------------------------------------------------------------------|
| Name of guideline panel(s) | Guideline Panel on Prevention and Treatment of VTE in Patients with Cancer |
|----------------------------|----------------------------------------------------------------------------|

| <i>Approved to participate?</i> | <i>Status</i>         | <i>Recusal may be required?</i> | <i>Reviewer Name and Date</i> | <i>Notes</i>                                                       |
|---------------------------------|-----------------------|---------------------------------|-------------------------------|--------------------------------------------------------------------|
| Yes                             | Unconflicted majority | Yes                             | 4/27/2015;<br>5/5/2015        |                                                                    |
| Yes                             |                       |                                 | 6/8/2020<br>Alexander         | On 6/3/2020, Dr. Stenehjem confirmed all information in this form. |
|                                 |                       |                                 |                               |                                                                    |
|                                 |                       |                                 |                               |                                                                    |

If status is conflicted minority, summarize all current material interests in affected companies:

| <i>Company</i> | <i>Description</i> | <i>Disclosure Date</i> | <i>ASH Notes</i> |
|----------------|--------------------|------------------------|------------------|
|                |                    |                        |                  |
|                |                    |                        |                  |
|                |                    |                        |                  |

Notes:

## Part D. New Declarations

The following interests were disclosed after appointment:

| <i>Company</i>           | <i>Description</i>                                                                                         | <i>Disclosure Date</i> | <i>ASH Internal Notes</i>                                                                                                                                                                                                                           |
|--------------------------|------------------------------------------------------------------------------------------------------------|------------------------|-----------------------------------------------------------------------------------------------------------------------------------------------------------------------------------------------------------------------------------------------------|
| Salarius Pharmaceuticals | Direct payment for consulting on Phase I clinical trial                                                    | 6/3/2020               | Not a COI. Salarius Pharmaceuticals does not market any drugs used in the treatment of VTE.                                                                                                                                                         |
| Iterion Therapeutics     | Direct payment for consulting on phase I clinical trial                                                    | 6/3/2020               | Not a COI. Iterion Therapeutics does not market any drugs used in the treatment of VTE.                                                                                                                                                             |
| Dracen Pharmaceuticals   | Direct payment for consulting on phase I clinical trial                                                    | 6/3/2020               | Not a COI. Dracen Pharmaceuticals does not market any drugs used in the treatment of VTE.                                                                                                                                                           |
| Novartis                 | Research funding for studies of AML and MDS. Dr. Stenehejm is the coinvestigator.                          | 6/3/2020               | Not a COI. Novartis does not market any drugs used in the treatment of VTE. Furthermore, the subject of the research is not related to the guideline topic, Dr. Stenehejm does not have a leadership role, and all funding goes to his institution. |
| University of Utah       | Institutional funding for study of thromboprophylaxis in cancer patients. Dr. Stenehejm is coinvestigator. | 6/3/2020               | Not a COI. The University of Utah is an academic institution and does not market any drugs used in the treatment of VTE. This is an update to Part B, Question 3.                                                                                   |
| AstraZeneca              | Observational outcomes study of lung cancer patients. Dr. Stenehejm is PI.                                 | 6/3/2020               | Not a COI. AstraZeneca does not market any drugs used in the treatment of VTE. Furthermore, the subject of the research is not related to the guideline topic and all                                                                               |

| <i>Company</i>       | <i>Description</i>                                                             | <i>Disclosure Date</i> | <i>ASH Internal Notes</i>                                                                                                                                                                 |
|----------------------|--------------------------------------------------------------------------------|------------------------|-------------------------------------------------------------------------------------------------------------------------------------------------------------------------------------------|
|                      |                                                                                |                        | funding goes to his institution.                                                                                                                                                          |
| Bristol Myers Squibb | Observational outcomes study of lung cancer patients. Dr. Stenehejm is the PI. | 6/3/2020               | Not a COI. BMS markets apixaban and Dr. Stenehejm has a leadership role, however the subject of the research is unrelated to the guideline topic and all funding goes to his institution. |
